# Supplementary material
Source: PubMed Central journal article supplement (PMC3259646)

## SUPPLEMENTARY MATERIALS

**mRNA quantification by Real Time-PCR (qPCR).** To analyze mRNA levels using tSYBR-GREEN q-PCR, the following primers were used:

ADENYLATE KINASE-3\_FWD 5'-CGTTGGATTACCCCTCCTAGC-3'  
 ADENYLATE KINASE-3\_REV 5'-GCTGGACTAACGGTTCACCA-3'  
 ADRENOMEDULLIN\_FWD 5'-GGAAGAGGGAAGTGC GGATGT-3'  
 ADRENOMEDULLIN\_REV 5'-GGCATCCGGACTGCTGTCT-3'  
 ALDOLASE-C\_FWD 5'-GGCTGCCACTGAGGAGTTC-3'  
 ALDOLASE-C\_REV 5'-CTGCTGCTCCACCATCTTCT-3'  
 BNIP3 (BCL2/adenovirus E1B 19kDa protein-interacting protein 3)\_FWD 5'-  
 CAGGGCTCCTGGGTAGAACT-3'  
 BNIP3 (BCL2/adenovirus E1B 19kDa protein-interacting protein 3)\_REV 5'-  
 CTCCGTCCAGACTCATGCTG-3'  
 CXCR4\_FWD 5'-CAGTGGCCGACCTCCTCTT-3'  
 CXCR4\_REV 5'-GGACTGCCTTGCATAGGAAGTT-3'  
 EFNA3\_FWD 5'-CACTCTCCCCCAGTTCACCAT-3'  
 EFNA3\_REV 5'-CGCTGATGCTCTTCTCAAGCT-3'  
 ENOLASE-1\_FWD 5'-GCCTCCTGCTCAAAGTCAAC-3'  
 ENOLASE-1\_REV 5'-AACGATGAGACACCATGACG-3'  
 GLUT-1 (Glucose transporter 1)\_FWD 5'-GATTGGCTCCTTCTCTGTGG-3'  
 GLUT-1 (Glucose transporter 1)\_REV 5'-TCAAAGGACTTGCCCAAGTTT-3'  
 HIF1 $\alpha$ \_FWD 5'-CGTTCCTTCGATCAGTTGTC-3'  
 HIF1 $\alpha$ \_REV 5'-TCAGTGGTGGCAGTGGTAGT-3'  
 HIF2 $\alpha$ \_FWD 5'-GCGCTAGACTCCGAGAACAT-3'  
 HIF2 $\alpha$ \_REV 5'-TGGCCACTTACTACCTGACCCTT-3'  
 Hum Beta Actin\_FWD: 5'-CCAGCTCACCATGGATGATG-3'  
 Hum Beta Actin\_REV: 5'-ATGCCGGAGCCGTTGTC-3'  
 IGF2\_FWD 5'-CCGTGCTTCCGGACAACCTT-3'  
 IGF2\_REV 5'-CTGCTTCCAGGTGTCATATTGG-3'  
 PAI-1 (Plasminogen Activator Inhibitor 1)\_FWD 5'-CACAAATCAGACGGCAGCACT-3'  
 PAI-1 (Plasminogen Activator Inhibitor 1)\_REV 5'-CATCGGGCGTGGTGAAGTTC-3'  
 VEGFA\_FWD 5'-CAACATCACCATGCAGATTATGC-3'  
 VEGFA\_REV 5'-TCGGCTTGTACATTTTTCTTGT-3'  
 VEGF-R\_REV 5'-AGTGGAGTACGTGAAGCCGC-3'  
 VEGF-R\_FWD 5'-AACTAGGCGACCTGCTGCAA-3'

**Acidosis and hypoxia.** To induce acidosis and hypoxia, 60-70% confluent ( $6-7 \times 10^3/\text{cm}^2$ ) cells were incubated in defined atmosphere chambers (Billups-Rothenberg Inc.). To induce acidosis, cells were placed in the chamber and then an appropriate gas mixture of either 20% CO<sub>2</sub>-80% air or 25% CO<sub>2</sub>-75% air was injected for 20 min, yielding pH of 7.0 and 6.6, respectively (1). Thereafter, the chamber was sealed and incubated at 37°C for the indicated time. Similarly, to induce hypoxia, a gas mixture of 5% CO<sub>2</sub>-95% N<sub>2</sub> was used, yielding about 1% O<sub>2</sub> (2,3) as measured using an ISO2 MarkII oxygen meter and electrode and Duo-18 software (World Precision Instruments) (4). In O<sub>2</sub> dose-response experiments, an hypoxic incubator was used (Forma series II incubator mod. 3131). In this case, O<sub>2</sub> tension is continuously monitored and adjusted to the desired value by N<sub>2</sub> injections. Where indicated,

hyper-buffered medium (EGM-2 supplemented with 25mM HEPES, pH 7.4) was added immediately before the hypoxic treatment.

**Small Interfering RNA-mediated Gene Silencing.** Small interfering RNAs (siRNA) targeting HIF1 $\alpha$ , HIF2 $\alpha$  or a scramble sequence (Santa Cruz) were transfected into HUVEC, according to manufacturer instruction. Briefly, cells were plated in Pen-Strep free medium and transfected the next day using siRNA Transfection Reagent (Santa Cruz). At the time of transfection, cells were 40% confluent ( $4 \times 10^3/\text{cm}^2$ ). After 8 hours, cells were re-fed with fresh medium and experiments were performed 16 hours later.

**Luciferase assay.** The rationale of this assay is based on the translational inhibition of the luciferase reporter gene by the cloning of miRNA-targeted sequences in its 3'UTR (5). pLUC\_control, pLUC\_24-926, pLUC\_768-822 (see Reporter plasmid generation) were transfected in U2OS cells using Eugene6 (Roche). p3 dishes were transfected with 100 ng of pLUC derivative and 1  $\mu\text{g}$  of pSUPER-miR-210. Alternatively, cells were transfected with 25 ng of pLUC derivative and 1  $\mu\text{g}$  of pBlueScript and exposed to hypoxia or normoxia for 48 hrs. Cellular extracts were tested with Dual Luciferase Assay (Promega), according to the manufacturer instructions, 48 hrs after transfection. Values were normalized according to luciferase mRNA levels.

**Expression and reporter plasmid generation.** To over-express miR-210, the pre-miR-210 sequence (MI0000286) was cloned between *Bgl*III and *Hind*III restriction sites, in pSUPER.retro.puro vector (pSUPER, Oligoengine).

To over-express an EFNA3 allele that can not be targeted by miR-210 (EFNA3 $\Delta$ ), EFNA3 cDNA was excised from pCMV-Sport6-EFNA3 (NCBI accession: BC017722) using KpnI and cloned in pBABE-puro retroviral vector (6) using standard techniques. Thus, the last 718 basepairs of EFNA3 cDNA, encompassing miR-210 binding site, were deleted.

pLUC derivatives were generated cloning 3'-UTR sequences of EFNA3 gene downstream of the stop codon in pMIR-REPORTER-LUC (pLUC, Ambion) between *Spe*I and *Hind* III restriction sites. The full length 3'UTR of the human EFNA3 gene was PCR amplified using the following primers: 5'-GGGACTAGTGAGAGATGGGGCGGGGCTTGG-3' and 5'-

GGGAAGCTTAAAAAGGCCAGGAGGATAGGTG-3', giving rise to pLUC\_24-926 plasmid.

EFNA3 gene 3'-UTR sequence 5'-

TTTGTCTTCTGTGAAGACAGGACCTATGCAACGCACAGACACTTTTGGAGACCGT-3', containing miR-210 predicted interaction site, gave rise to pLUC\_768-822.

EFNA3 gene 3'-UTR sequence 5'-

TTTGTCTTCTGTGAAGACAGGACCTATGCAAACACTTTTGGAGACCGT-3' deleted of the miR-210 seed complementary sequence (799-805 from stop codon) gave rise to pLUC\_control.

**Northern blot.** To detect miRNAs, total RNA was extracted with TRIzol, electrophoresed in a 15% polyacrylamide/7 M urea gel (25  $\mu\text{g}/\text{lane}$ ) and transferred by electroblotting onto Amersham Hybond-N<sup>+</sup> membrane (GE Healthcare). Hybridization was performed over-night at 37°C, with terminally <sup>32</sup>P-labeled DNA oligos. To detect mRNAs, Northern blotting was performed as previously described (7).

**Immunofluorescence.** HUVEC were fixed with 3% paraformaldehyde and stained with  $\alpha$ -ephrin-A3 (EFNA3) antibody (K-19, Santa Cruz or H00001944-A01, Abnova) as previously described (7). To obtain a semi-quantitative estimate of EFNA3 expression, random field pictures were taken using the same exposure time by a blinded reader and 50 cells for each sample were quantified using Scion Image software (www.scioncorp.com).

**Apoptosis and cell cycle analysis.** Apoptosis was assessed by measuring the amount of nucleosomes generated during the apoptotic fragmentation of cellular DNA by Cell Death Detection Elisa (Roche), according to manufacturer instructions. For cell cycle analysis HUVEC were incubated for 30 minutes with 20  $\mu\text{M}$  bromodeoxyuridine (BrdUrd, Sigma) and then fixed with 70% ethanol. Cell cycle analysis

was performed analyzing  $1.5 \times 10^4$  cells by combined BrdUrd and propidium iodide staining, using a Becton Dickinson flow cytometer. Cell Quest software was used to determine the percentage of BrdUrd-positive cells (7).

**Capillary-like formation assay and chemotaxis.** HUVEC were plated in 16-mm wells ( $4 \times 10^4$  cells per well) that were previously coated with reconstituted basement membrane (Cultrex, Trevigen), in the presence or absence of EGM-2 growth factors. After 6 hours (hrs), the cells were fixed in 3% paraformaldehyde. To quantify capillary-like structures, internodal points formed in 14 fields per well (magnification 10X) were counted by a blinded reader (1).

HUVEC chemotaxis on 12  $\mu$ m collagen IV-coated pore-size polycarbonate filters (Costar) was evaluated in 48-well Boyden's chambers as previously described (8). Migration medium was: RPMI, 25 mM HEPES pH7.4, 0.01% FCS. After staining with Diff-Quick (DADE), the number of migrating cells was determined by counting 6 random fields (magnification 40X) in blind. The migration index (M.I.) was calculated by dividing the number of migrated cells in the presence of 20 ng/ml VEGF (R&D) by the number of migrated cells in migration medium alone.

**Retroviral infection.** Phoenix-ampho cells were transfected with pSUPER or pSUPER-miR-210, or with pBABE or pBABE-EFNA3 $\Delta$ , together with pMD2-VSVG. The medium containing the pseudotyped emerging retrovirus was harvested 48 and 72 hrs after transfection. To assay for infectious virus, HUVEC were infected and selected in puromycin-containing medium (0.5  $\mu$ g/ml, Sigma) so that the vast majority of the untransduced cells were eliminated. Over-expression of miR-210 or EFNA3 $\Delta$  was confirmed by qPCR.

**Adenoviral infection.** Adenoviral vector infection was performed as previously described (9). Briefly, HUVEC were infected in serum-free medium for 1 hr with 200 MOI of adenoviruses encoding either GFP alone (Ad-GFP) or HIF1 $\alpha$  and GFP (Ad- HIF1 $\alpha$ , a kind gift of Gabriele Toietta and Silvia Truffa, IDI-IRCCS, Rome) and then cultured for additional 24 hrs before further treatment.

## SUPPLEMENTARY FIGURE LEGENDS

**Table S1.** Experimental plan and results are summarized. miRNAs, measured using a qPCR based assay detecting only mature miRNA species, are divided in two groups corresponding to the 96-well format adopted in the assay. For each miRNA, the following data are shown: raw data (expressed as Ct values), median-normalized data (expressed as  $\Delta$ Ct values), and the difference between  $\Delta$ Ct values of the normoxic and the hypoxic samples (expressed as  $\Delta\Delta$ Ct values). To minimize the number of false positives, only miRNAs that were regulated by hypoxia more than 4 fold in at least two consecutive time-points were considered.

**Table S2.** miRNAs expressed in normoxic HUVEC. miRNAs are ranked according to Ct. Light and dark gray shaded boxes indicate miRNAs displaying the same Ct value. miRNAs with a Ct value  $>35$  were considered as not expressed. We found that, out of 157 tested, 130 miRNA were detectable in normoxic HUVEC, albeit at different levels.

**Table S3.** Bioinformatic prediction of miR-210 and miR-150 targets. An *in silico* search of potential targets was performed using PicTar, miRANDA, Sanger MirBase and Targetscan algorithms. Targets recognized by at least 3 softwares are shown. The number of algorithms recognizing each target is indicated.

**Fig. S1. Hypoxia induces growth arrest and cell death .** HUVEC ( $4\text{-}5 \times 10^3/\text{cm}^2$ ) were plated and the next day exposed to 1% hypoxia for the indicated time (n=5). A) HUVEC growth curve. Data are expressed as % of T0 normoxic control (\* $P < 0.001$ ). At 48 hrs almost 50% of the cells were dead. B) Cells were pulse labeled with BrdUrd for 30 minutes before harvesting, fixed and then stained with propidium iodide and an  $\alpha$ -BrdUrd antibody. Representative FACS-analysis dot plots of 48 hrs samples are shown. C) Bar graph representing BrdUrd incorporation rate during the hypoxic time course. Differences are statistically significant ( $^{\#}P < 0.05$ ; \*  $P < 0.005$ ).

**Fig. S2. miRNA regulation by hypoxia.** HUVEC were exposed to 1% hypoxia for the indicated times and low-molecular weight RNA was extracted. miRNA expression profile was determined by a panel qPCR assays, run in a 96-well format (n= 4-11 each time-point). To detect each miRNA, a specific looped primer was used for Reverse Transcription, followed by amplification with a specific primer pair and detection using a TaqMan probe, that added further specificity. Expression data were then normalized according to miR-16 values and expressed as a function of normoxic values using the comparative Ct method. Graphs show expression differences as fold-change compared to normoxic values. A) miR-16 is not modulated by hypoxia (n=11; differences are not significant). B) miR-150 expression is up-regulated by hypoxia ( $^{\#}P < 0.04$ ; \* $P < 0.007$ ). C) miR-328 is induced by hypoxia, however its increase is much slower than suggested by the profiling experiments (\* $P < 0.004$ ; n=8).

**Fig. S3. Modulation of miR-210 activation.** A) HUVEC were exposed to different  $\text{O}_2$  concentrations for 24 hrs. The bar graph shows that miR-210 expression increased as  $\text{O}_2$  concentration decreased (\* $P < 0.001$ ; n=4). B) Acidosis and oxidative stress are unlikely to play a role in miR-210 up-regulation by hypoxia. Acidification of the culture medium (pH 6.6 and pH 7.0) and HUVEC treatment with 400  $\mu\text{M}$   $\text{H}_2\text{O}_2$  for 8 and 24 hours did not activate miR-210 expression; hyperbuffering of the medium with HEPES pH7.4 did not prevent the hypoxic induction of miR-210 (\* $P < 0.001$ ;  $^{\#}P < 0.03$ ; n=4-11). C) Cell confluence may induce a condition of local excessive consumption of oxygen and glucose, leading to pericellular near-anoxia and ATP depletion. To test whether these events were involved in miR-210 activation, HUVEC were plated at very low density ( $2 \times 10^3/\text{cm}^2$ ); the next day, culture medium was supplemented with 10 or 20 mM glucose (total [glucose] = 15 and 25 mM, respectively) and cells were exposed to hypoxia for the indicated time. The bar graph shows that miR-210 expression was strongly induced in all tested conditions (\*  $P < 0.001$ ; n=4).

**Fig. S4. miR-210 regulation by hypoxia is not restricted to EC.** Time dependent induction of miR-210 by hypoxia in U2OS osteosarcoma cell line measured by (A) qPCR (\* $P < 0.001$ ;  $^{\#}P < 0.006$ ; n=3) and by (B) northern blotting.

**Fig. S5. HIF1 $\alpha$  positively regulates miR-210 expression.** HUVEC were transfected with control siRNA or with siRNAs targeting HIF1 $\alpha$  or HIF2 $\alpha$ , either alone or in combination. Afterwards, cells were exposed to hypoxia for 24 hrs and HIF1 $\alpha$  and HIF2 $\alpha$  and miR-210 levels were measured. siRNAs targeting HIF1 $\alpha$  (A; \* $P < 0.05$ ; n=3) or HIF2 $\alpha$  (B; \* $P < 0.001$ ; n=3) decreased the expression of both targets, each one specifically. However, only the siRNA targeting HIF1 $\alpha$  decreased miR-210 up-regulation, specifically (C; \* $P < 0.006$ ; n=3). D and E) HUVEC were infected with adenoviral vectors encoding either GFP alone (Ad-GFP) or HIF1 $\alpha$  and GFP (Ad-HIF1 $\alpha$ ). Twentyfour hrs later, the levels of HIF1 $\alpha$  (D; \* $P < 0.005$ ; n=5) and miR-210 (E; \* $P < 0.02$ ; n=5) were measured. HIF1 $\alpha$  expression induced a small but reproducible activation of miR-210.

**Fig. S6. miR-210 expression does not affect global gene-expression response to hypoxia.** The expression of 11 hypoxia-target genes was measured by qPCR both in HUVEC exposed to hypoxia for 24 hrs and in cells overexpressing miR-210 in normoxic conditions (\* $P < 0.001$ ; \* $P < 0.02$ ;  $n = 4$ ).

**Fig. S7. EC survival is regulated by miR-210.** A) HUVEC ( $4\text{--}5 \times 10^3/\text{cm}^2$ ) were plated and the next day exposed to hypoxia. Cells were counted at the indicated time and data are expressed as % of T0 normoxic control. Differences between control and miR-210 expressing cells are not statistically significant, both in hypoxia and in normoxia ( $n = 4$ ). B, C and D) HUVEC ( $5 \times 10^3$  cells/ $\text{cm}^2$ ) were transfected with anti-miR-210 or with scramble control and, 24 hrs later, cells were counted (B; \* $P < 0.003$ ; #  $P < 0.02$ ;  $n = 4$ ), apoptosis was measured assessing the apoptotic fragmentation of cellular DNA (C; \* $P < 0.01$ ;  $n = 3$ ) and DNA synthesis rate was measured by BrdUrd incorporation (D; \* $P < 0.001$ ;  $n = 3$ ). The difference in BrdUrd incorporation rate, albeit statistically significant is unlikely to have major biological consequences.

**Fig. S8. EFNA3 down-modulation in hypoxic cells.** A) HUVEC were exposed to hypoxia for 24 and 48 hrs. Then, cells were fixed and stained with both the DNA intercalating agent Hoechst 33342 (blue) and an antibody to EFNA3 (H00001944-A01, Abnova, green). Size bar = 50  $\mu\text{m}$ . EFNA3 signal was quantified using Scion Image software and after 24 and 48 hrs of hypoxia the decrease of EFNA3 fluorescence was about 80% compared to the normoxic control (\* $P < 0.001$ ;  $n = 3$ ). B) EFNA3 transcript levels are increased by exposure to hypoxia. EFNA3 mRNA was measured by qPCR and values are expressed as fold change compared to normoxic control (\* $P < 0.001$ ;  $n = 8$ ). C) EFNA3 mRNA levels were not modulated by miR-210 expression. The bar graph shows values expressed as fold change compared to normoxic control. Differences are not statistically significant ( $n = 4$ ).

## REFERENCES

1. D'Arcangelo, D., Facchiano, F., Barlucchi, L. M., Melillo, G., Illi, B., Testolin, L., Gaetano, C., and Capogrossi, M. C. (2000) *Circ Res.* **86**, 312-318.
2. Zaccagnini, G., Martelli, F., Fasanaro, P., Magenta, A., Gaetano, C., Di Carlo, A., Biglioli, P., Giorgio, M., Martin-Padura, I., Pelicci, P. G., and Capogrossi, M. C. (2004) *Circulation.* **109**, 2917-2923.
3. Stern, M. D., Chien, A. M., Capogrossi, M. C., Pelto, D. J., and Lakatta, E. G. (1985) *Circ Res.* **56**, 899-903.
4. Luo, F., Liu, X., Yan, N., Li, S., Cao, G., Cheng, Q., Xia, Q., and Wang, H. (2006) *BMC Cancer.* **6**, 26.
5. Cheng, A. M., Byrom, M. W., Shelton, J., and Ford, L. P. (2005) *Nucleic Acids Res.* **33**, 1290-1297.
6. Morgenstern, J. P., and Land, H. (1990) *Nucleic Acids Res.* **18**, 3587-3596.
7. Martelli, F., Hamilton, T., Silver, D. P., Sharpless, N. E., Bardeesy, N., Rokas, M., DePinho, R. A., Livingston, D. M., and Grossman, S. R. (2001) *Proc Natl Acad Sci U S A.* **98**, 4455-4460.
8. Germani, A., Di Carlo, A., Mangoni, A., Straino, S., Giacinti, C., Turrini, P., Biglioli, P., and Capogrossi, M. C. (2003) *Am J Pathol.* **163**, 1417-1428.
9. Cicchillitti, L., Fasanaro, P., Biglioli, P., Capogrossi, M. C., and Martelli, F. (2003) *J Biol Chem.* **278**, 19509-19517.

| TABLE S1 Experiment Design             |                                                                                                                                                                                                                                                                                                                                                                                                                                                                                                                                                                                                                                                                                                                                                                                                                                                                                                                                                                                                                                                                                                                                                                                                                                       |
|----------------------------------------|---------------------------------------------------------------------------------------------------------------------------------------------------------------------------------------------------------------------------------------------------------------------------------------------------------------------------------------------------------------------------------------------------------------------------------------------------------------------------------------------------------------------------------------------------------------------------------------------------------------------------------------------------------------------------------------------------------------------------------------------------------------------------------------------------------------------------------------------------------------------------------------------------------------------------------------------------------------------------------------------------------------------------------------------------------------------------------------------------------------------------------------------------------------------------------------------------------------------------------------|
| The goal of the experiment:            | microRNA-210 modulates Endothelial Cell Response to Hypoxia and Ephrin-A3 levels                                                                                                                                                                                                                                                                                                                                                                                                                                                                                                                                                                                                                                                                                                                                                                                                                                                                                                                                                                                                                                                                                                                                                      |
| A brief description of the experiment: | MicroRNAs (miRNAs) are an abundant class of small non-protein-coding RNAs that function as negative gene regulators. The aim of the present study was to investigate miRNAs regulation and functional role in endothelial cell response to hypoxia. Human Umbelical Vein Endothelial Cells (HUVEC) were exposed to 1% oxygen for 8-48 hours and a selection of 157 miRNAs was measured using a real-time PCR assay designed to quantify only mature miRNAs. The expression of miR-210 and miR-150 progressively increased upon exposure to hypoxia. Furthermore, miR-210 up-regulation by hypoxia was not restricted to vascular cells and in HUVEC cultivated in normoxic conditions, neither acidification nor oxidative stress modulated miR-210 level. miR-210 expression in normoxia stimulated cell migration and the formation of capillary-like structures, while its inhibition induced apoptosis. We determined that one relevant target of miR-210 in hypoxia was Ephrin-A3, since miR-210 was necessary and sufficient to down-modulate its expression. Moreover, luciferase reporter assays showed that Ephrin-A3 was a direct target of miR-210. We conclude that miR-210 is a crucial component of endothelial cell re |
| Keywords:                              | microRNA; Hypoxia; endothelium; Real Time PCR; comparative Ct method                                                                                                                                                                                                                                                                                                                                                                                                                                                                                                                                                                                                                                                                                                                                                                                                                                                                                                                                                                                                                                                                                                                                                                  |
| Experimental factors:                  | normoxia or 8-24-48 hours of hypoxia                                                                                                                                                                                                                                                                                                                                                                                                                                                                                                                                                                                                                                                                                                                                                                                                                                                                                                                                                                                                                                                                                                                                                                                                  |
| Experimental design:                   | Human Umbelical Vein Endothelial Cells (HUVEC) were exposed to 1% oxygen for 8-48 hours and a selection of 157 miRNAs was measured using a real-time PCR assay designed to quantify only mature miRNAs.                                                                                                                                                                                                                                                                                                                                                                                                                                                                                                                                                                                                                                                                                                                                                                                                                                                                                                                                                                                                                               |
| Primers description:                   | The basis of TaqMan MicroRNA Assays is a target-specific stem-loop reverse-transcriptase primer. The short length of mature miRNAs (~22 nt) prohibits conventional design of a randomprimed retrotranscription step followed by a specific Real Time assay. The stem-loop accomplishes two goals: 1) specificity for only the mature miRNA target, and 2) formation of an RT primer/mature miRNA-chimera, extending the 5' end of the miRNA. The resulting longer RT amplicon presents a template amenable to Real-Time TaqMan assay. TaqMan miRNA assays can between highly homologous targets, with only a single nucleotide mismatch.                                                                                                                                                                                                                                                                                                                                                                                                                                                                                                                                                                                              |

| Samples used, extract preparation and amplification           |                                                                                                                                                                                                                                                                                                                                                                                                                                                                                                                                        |
|---------------------------------------------------------------|----------------------------------------------------------------------------------------------------------------------------------------------------------------------------------------------------------------------------------------------------------------------------------------------------------------------------------------------------------------------------------------------------------------------------------------------------------------------------------------------------------------------------------------|
| The origin of each biological sample and its characteristics: | HUVEC - Umbilical Vein Endothelial Cells. The analyzed population represents a pool of 100 independent donors. Cells were purchased from Clonetics.                                                                                                                                                                                                                                                                                                                                                                                    |
| Manipulation of biological samples and protocols used:        | HUVEC were grown in EGM-2 (Bio-Whittaker) containing 2% FBS, at 37°C in a humidified atmosphere with 5% CO2/95% air. Hypoxia was induced incubating 60-70% confluent (6-7x103/cm2) cells in a humidified atmosphere of 5% CO2-95% N2, yielding an O2 concentration of about 1%                                                                                                                                                                                                                                                         |
| Technical protocols for preparing extract:                    | Total RNA was extracted using TRIzol (Invitrogen) and the small RNAs fraction was enriched using the PureLink miRNA Isolation Kit (Invitrogen). RNA concentrations were determined with a NanoDrop Spectrophotometer (NanoDrop Technologies) and 1 ng per sample was used for the assays.                                                                                                                                                                                                                                              |
| Technical protocols for Real-Time PCR:                        | 3 ng per sample were retrotranscribed using The TaqMan MicroRNA Reverse Transcription Kit and specific primers for each miRNA. See figure 1 for retrotranscription program. miRNA levels were analysed using the TaqMan Real Time PCR method in an Applied Biosystems 7000 Thermocycler (9600 emulation mode), using 1.6 mL of each retrotranscribed sample, the TaqMan Universal PCR Master Mix No AmpErase UNG and specific primers for each miRNA. See figure 2 for PCR programAll reagents were purchased from Applied Biosystems. |

| Step Type | Time (min) | Temperature ( ° C) |
|-----------|------------|--------------------|
| HOLD      | 30         | 16                 |
| HOLD      | 30         | 42                 |
| HOLD      | 5          | 85                 |
| HOLD      | ∞          | 4                  |

**Figure 1: retrotranscription program**

| Step        | AmpliTaq Gold® Enzyme Activation | PCR               |               |
|-------------|----------------------------------|-------------------|---------------|
|             |                                  | CYCLE (40 cycles) |               |
|             | HOLD                             | Denature          | Anneal/Extend |
| Time        | 10 min                           | 15 sec            | 60 sec        |
| Temp ( ° C) | 95                               | 95                | 60            |

**Figure 2: Real-Time PCR program**

| Measurement data and specifications |                                                                                                                                                                                                                                                                                                                                                                                                                                                                                    |
|-------------------------------------|------------------------------------------------------------------------------------------------------------------------------------------------------------------------------------------------------------------------------------------------------------------------------------------------------------------------------------------------------------------------------------------------------------------------------------------------------------------------------------|
| Software used:                      | Real Time PCR are quantified with ABI Prism 7000 SDS (Applied Biosystems).                                                                                                                                                                                                                                                                                                                                                                                                         |
| Raw datas and normalization:        | <ul style="list-style-type: none"> <li>- Ct: Raw data are expressed as Cycle Threshold (Ct). The threshold line is setted in the exponential phase of the amplification. The Ct indicates the cycle at which the sample reaches this level.</li> <li>- DCT: miRNAs were assayed in a 96-well format and samples were normalized to the median Ct value of each assay.</li> <li>- DDCT: this value indicates the DCT variation vs the control of each experimental point</li> </ul> |

| PLATE 1: raw data |                |          |      |      |      |      |               |        |      |      |      |                |      |      |      |      |                |      |      |      |      |
|-------------------|----------------|----------|------|------|------|------|---------------|--------|------|------|------|----------------|------|------|------|------|----------------|------|------|------|------|
| Ct                |                | normoxia |      |      |      |      | hypoxia 8 hrs |        |      |      |      | hypoxia 24 hrs |      |      |      |      | hypoxia 48 hrs |      |      |      |      |
| WELL              | DETECTOR       | A        | B    | C    | D    | ave  | A             | B      | C    | D    | ave  | A              | B    | C    | D    | ave  | A              | B    | C    | D    | ave  |
| A1                | hsa-let-7a     | 21.0     | 21.1 | 20.1 | 20.0 | 20.5 | 21.4          | 21.6   | 19.7 | 20.2 | 20.7 | 20.1           | 21.3 | 20.5 | 20.2 | 20.5 | 20.4           | 20.4 | 20.3 | 20.3 | 20.4 |
| A2                | cel-lin-4      | 35.8     | 38.5 | 36.0 | 36.0 | 36.6 | 37.0          | 37.5   | 32.1 | 35.9 | 35.6 | 37.6           | 38.2 | 34.5 | 35.7 | 36.5 | 38.3           | 37.1 | 35.1 | 35.2 | 36.4 |
| A3                | control        | 25.3     | 26.3 | 28.0 | 27.3 | 26.7 | 28.9          | 28.3   | 27.4 | 27.7 | 28.1 | 27.7           | 28.1 | 29.7 | 29.2 | 28.7 | 29.2           | 30.0 | 31.1 | 31.2 | 30.4 |
| A4                | hsa-miR-9      | 33.2     | 34.2 | 31.8 | 32.8 | 33.0 | 35.0          | 33.9   | 28.7 | 30.1 | 31.9 | 34.3           | 34.5 | 32.2 | 31.2 | 33.1 | 33.3           | 32.6 | 32.1 | 32.0 | 32.5 |
| A5                | hsa-miR-9*     | 35.0     | 40.0 | 35.5 | 35.1 | 36.4 | 37.5          | 38.0   | 33.0 | 35.7 | 36.1 | 36.5           | 38.7 | 36.2 | 34.8 | 36.6 | 35.6           | 35.4 | 37.5 | 36.8 | 36.3 |
| A6                | hsa-miR-10a    | 23.9     | 24.6 | 24.1 | 24.2 | 24.2 | 25.0          | 25.1   | 24.1 | 24.2 | 24.6 | 24.1           | 24.5 | 24.1 | 24.1 | 24.2 | 23.7           | 23.5 | 24.4 | 24.5 | 24.0 |
| A7                | control        | 22.5     | 23.2 | 23.3 | 23.2 | 23.1 | 24.0          | 24.2   |      |      | 24.1 | 23.0           | 23.2 | 23.4 | 23.3 | 23.2 | 22.7           | 22.8 | 24.1 | 24.2 | 23.4 |
| A8                | hsa-miR-15a    | 21.4     | 22.3 | 24.3 | 24.2 | 23.0 | 22.6          | 22.2   | 24.1 | 24.3 | 23.3 | 23.1           | 23.5 | 24.4 | 24.3 | 23.8 | 22.3           | 22.6 | 25.1 | 25.4 | 23.8 |
| A9                | hsa-miR-15b    | 21.3     | 22.4 | 21.8 | 21.8 | 21.8 | 22.5          | 22.6   | 21.3 | 21.4 | 21.9 | 21.6           | 22.2 | 22.1 | 21.9 | 22.0 | 21.4           | 21.8 | 23.0 | 23.1 | 22.3 |
| A10               | hsa-miR-16     | 19.6     | 20.8 | 20.6 | 20.6 | 20.4 | 21.1          | 20.7   | 20.3 | 20.3 | 20.6 | 20.5           | 20.4 | 20.8 | 20.3 | 20.5 | 19.9           | 20.0 | 21.7 | 21.4 | 20.8 |
| A11               | hsa-miR-17-3p  | 26.3     | 27.6 | 26.7 | 26.5 | 26.8 | 28.0          | 27.9   | 25.8 | 26.3 | 27.0 | 27.1           | 26.9 | 27.0 | 26.8 | 26.9 | 27.2           | 27.0 | 27.1 | 27.2 | 27.1 |
| A12               | hsa-miR-17-5p  | 20.5     |      | 19.8 | 20.2 | 20.2 | 21.7          | 21.9   | 19.1 | 20.0 | 20.7 | 20.8           | 21.4 | 20.4 | 19.6 | 20.5 | 21.0           | 21.7 | 21.2 | 21.4 | 21.3 |
| B1                | ath-miR159a    | 37.8     | 36.2 | 36.4 | 37.2 | 36.9 | 40.0          | 36.9   | 36.3 | 35.2 | 37.1 | 36.9           | 40.0 | 34.6 | 36.9 | 37.1 | 39.0           | 39.7 | 37.0 | 37.6 | 38.3 |
| B2                | hsa-miR-19a    | 20.3     | 21.4 | 20.1 | 20.7 | 20.6 | 23.1          | 23.9   | 21.4 | 22.4 | 22.7 | 20.5           | 22.0 | 24.0 | 23.4 | 22.5 | 20.6           | 21.9 | 22.6 | 24.7 | 22.4 |
| B3                | control        | 19.7     | 20.6 | 18.9 | 19.1 | 19.5 | 20.8          | 20.6   |      |      | 20.7 | 20.5           | 21.0 | 19.4 | 19.3 | 20.0 | 20.3           | 20.1 | 20.1 | 20.3 | 20.2 |
| B4                | hsa-miR-20     | 21.4     | 21.5 | 21.3 | 21.5 | 21.4 | 22.9          | 22.1   | 22.2 | 21.9 | 22.3 | 21.9           | 22.9 | 23.0 | 22.4 | 22.6 | 22.3           | 24.1 | 22.7 | 23.7 | 23.2 |
| B5                | hsa-miR-21     | 17.1     | 17.6 | 18.0 | 18.3 | 17.7 | 18.8          | 18.4   | 17.1 | 17.6 | 18.0 | 17.6           | 18.1 | 18.6 | 18.2 | 18.2 | 17.6           | 17.7 | 18.5 | 19.1 | 18.2 |
| B6                | control        | 22.0     | 23.0 | 22.8 | 23.3 | 22.8 | 23.4          | 23.1   |      |      | 23.2 | 22.7           | 23.3 | 23.7 | 23.6 | 23.3 | 22.3           | 22.7 | 24.4 | 24.4 | 23.5 |
| B7                | hsa-miR-23a    | 19.6     | 20.2 | 20.6 | 20.6 | 20.2 | 20.9          | 20.8   | 20.1 | 20.5 | 20.6 | 19.4           | 19.9 | 22.1 | 21.6 | 20.7 | 19.5           | 20.0 | 21.4 | 21.8 | 20.7 |
| B8                | hsa-miR-23b    | 23.6     | 23.8 | 23.6 | 24.2 | 23.8 | 24.6          | 24.2   | 23.7 | 23.9 | 24.1 | 24.1           | 24.2 | 24.4 | 24.2 | 24.2 | 23.7           | 23.9 | 25.1 | 25.7 | 24.6 |
| B9                | control        | 19.5     | 20.8 | 19.2 | 19.5 | 19.7 | 20.3          | 20.8   |      |      | 20.5 | 19.7           | 20.5 | 20.0 | 20.0 | 20.0 | 20.0           | 19.7 | 20.6 | 20.9 | 20.3 |
| B10               | hsa-miR-25     | 22.7     | 23.6 | 21.3 | 22.3 | 22.5 | 24.0          | 24.0   | 22.1 | 22.0 | 23.0 | 22.9           | 23.7 | 22.8 | 22.4 | 23.0 | 23.0           | 23.2 | 23.2 | 23.7 | 23.3 |
| B11               | hsa-miR-26a    | 22.0     | 23.2 | 22.2 | 22.1 | 22.4 | 23.1          | 22.4   | 22.1 | 21.9 | 22.4 | 21.8           | 22.6 | 22.5 | 22.0 | 22.2 | 21.7           | 21.8 | 22.6 | 22.7 | 22.2 |
| B12               | hsa-miR-26b    | 23.4     | 24.6 | 23.2 | 23.7 | 23.7 | 24.7          | 24.6   | 23.7 | 22.8 | 24.0 | 23.0           | 24.4 | 23.3 | 22.5 | 23.3 | 23.2           | 23.4 | 24.0 | 24.5 | 23.8 |
| C1                | hsa-miR-27a    | 21.0     | 21.8 | 21.7 | 21.3 | 21.4 | 22.5          | 22.4   | 21.0 | 21.0 | 21.7 | 21.4           | 21.5 | 21.4 | 20.7 | 21.3 | 21.5           | 21.6 | 22.2 | 22.6 | 22.0 |
| C2                | hsa-miR-27b    | 22.5     | 23.1 | 24.2 | 24.4 | 23.5 | 24.1          | 24.3   | 23.9 | 23.9 | 24.0 | 22.6           | 22.5 | 24.1 | 23.7 | 23.2 | 22.5           | 22.8 | 24.8 | 25.1 | 23.8 |
| C3                | hsa-miR-28     | 24.1     | 25.2 | 24.6 | 24.7 | 24.6 | 25.5          | 25.3   | 24.2 | 24.4 | 24.8 | 24.9           | 25.3 | 25.1 | 24.8 | 25.0 | 24.6           | 24.7 | 25.3 | 25.5 | 25.0 |
| C4                | hsa-miR-29a    | 19.6     | 20.1 | 19.9 | 19.7 | 19.8 | 21.3          | 20.2   | 19.8 | 20.2 | 20.4 | 19.1           | 20.3 | 20.5 | 20.0 | 20.0 | 19.1           | 19.7 | 20.4 | 20.9 | 20.0 |
| C5                | hsa-miR-29b    | 20.7     | 21.5 | 20.9 | 20.9 | 21.0 | 22.1          | 22.1   | 20.3 | 21.3 | 21.5 | 21.3           | 21.5 | 22.0 | 21.2 | 21.5 | 21.2           | 21.3 | 22.1 | 22.3 | 21.7 |
| C6                | hsa-miR-29c    | 19.5     | 20.0 | 20.8 | 19.6 | 20.0 | 20.8          | 20.4   | 19.5 | 20.2 | 20.2 | 19.2           | 20.6 | 20.1 | 20.1 | 20.0 | 19.6           | 19.9 | 20.6 | 20.6 | 20.2 |
| C7                | hsa-miR-30a-3p | 24.1     | 25.1 | 24.3 | 24.0 | 24.4 | 26.2          | 25.1   | 23.8 | 24.3 | 24.9 | 24.3           | 24.9 | 24.5 | 24.4 | 24.5 | 24.3           | 24.9 | 25.5 | 25.4 | 25.0 |
| C8                | hsa-miR-30b    | 21.1     | 22.4 | 21.8 | 21.8 | 21.8 | 23.1          | 22.2   | 22.4 | 22.3 | 22.5 | 22.1           | 22.5 | 22.5 | 22.3 | 22.3 | 21.6           | 22.0 | 23.1 | 23.1 | 22.4 |
| C9                | hsa-miR-30c    | 21.6     | 22.4 | 22.3 | 22.5 | 22.2 | 23.0          | 23.1   | 22.7 | 22.7 | 22.9 | 22.4           | 22.3 | 22.6 | 22.4 | 22.4 | 22.2           | 22.2 | 23.3 | 23.5 | 22.8 |
| C10               | hsa-miR-30d    | 23.8     | 24.4 | 25.2 | 25.7 | 24.8 | 25.4          | 25.4   | 24.6 | 25.6 | 25.2 | 24.2           | 24.5 | 25.2 | 24.8 | 24.7 | 22.9           | 24.1 | 25.4 | 25.7 | 24.5 |
| C11               | hsa-miR-30e    | 24.8     | 26.5 | 25.7 | 26.0 | 25.7 | 27.1          |        | 25.7 | 26.3 | 26.3 | 26.2           | 26.5 | 27.5 | 27.3 | 26.9 | 24.9           | 26.1 | 27.3 | 27.6 | 26.5 |
| C12               | hsa-miR-31     | 21.1     | 21.9 | 21.8 | 21.3 | 21.5 | 22.2          | 22.0   | 20.8 | 21.0 | 21.5 | 21.3           | 22.2 | 21.6 | 21.4 | 21.6 | 21.4           | 22.1 | 22.3 | 22.0 | 22.0 |
| D1                | control        | 24.5     | 25.7 | 26.9 | 27.8 | 26.2 | 27.0          | 27.1   |      |      | 27.0 | 24.4           | 26.9 | 27.3 | 27.3 | 26.5 | 26.1           | 26.0 | 27.9 | 28.2 | 27.1 |
| D2                | control        | 27.1     | 28.1 | 28.4 | 28.5 | 28.0 | 29.2          | 29.0   |      |      | 29.1 | 28.6           | 28.2 | 28.7 | 28.1 | 28.4 | 28.1           | 27.4 | 28.8 | 28.8 | 28.3 |
| D3                | hsa-miR-34a    | 21.4     | 22.0 | 21.4 | 21.4 | 21.5 | 22.7          | 21.7   | 21.3 | 21.4 | 21.8 | 21.1           | 21.2 | 21.9 | 21.5 | 21.4 | 20.7           | 20.3 | 21.9 | 22.0 | 21.2 |
| D4                | hsa-miR-34b    | 33.6     | 34.2 | 33.2 | 33.1 | 33.5 | 35.0          | 34.9   | 32.2 | 30.5 | 33.1 | 33.3           | 34.3 | 34.2 | 34.3 | 34.0 | 32.6           | 33.8 | 32.4 | 32.6 | 32.8 |
| D5                | hsa-miR-34c    | 34.6     | 35.0 | 32.0 | 32.0 | 33.4 | 36.3          | 36.0   | 30.6 | 31.6 | 33.6 | 34.0           | 33.9 | 33.4 | 33.9 | 33.8 | 33.0           | 32.8 | 32.7 | 33.1 | 32.9 |
| D6                | hsa-miR-92     | 21.6     | 22.7 | 21.2 | 21.2 | 21.7 | 22.8          | 22.3   | 20.8 | 20.8 | 21.7 | 21.6           | 22.3 | 21.5 | 21.2 | 21.6 | 21.6           | 21.5 | 22.1 | 22.3 | 21.9 |
| D7                | control        | 19.6     | 21.3 | 20.4 | 20.5 | 20.4 | 22.2          | 21.9   |      |      | 22.0 | 21.5           | 22.4 | 20.5 | 20.5 | 21.2 | 21.4           | 22.0 | 21.6 | 21.9 | 21.7 |
| D8                | hsa-miR-95     | 32.1     | 33.7 | 33.5 | 33.6 | 33.2 | 34.2          | 34.2   | 32.4 | 34.2 | 33.8 | 32.6           | 33.8 | 34.0 | 33.5 | 33.5 | 31.7           | 32.5 | 34.3 | 34.6 | 33.3 |
| D9                | hsa-miR-96     | 34.2     | 34.7 | 36.5 | 35.2 | 35.2 | 35.1          | 34.6   | 35.5 | 33.6 | 34.7 | 34.5           | 35.1 | 36.1 | 36.7 | 35.6 | 33.8           | 33.5 | 35.3 | 36.5 | 34.8 |
| D10               | hsa-miR-98     | 23.3     | 24.8 | 24.0 | 24.4 | 24.1 | 25.1          | 24.7   | 24.7 | 24.5 | 24.7 | 24.4           | 24.7 | 25.3 | 25.1 | 24.9 | 23.4           | 24.1 | 25.7 | 26.3 | 24.9 |
| D11               | hsa-miR-99a    | 20.5     | 21.7 | 21.7 | 21.4 | 21.3 | 21.3          | 21.6</ |      |      |      |                |      |      |      |      |                |      |      |      |      |

| PLATE 1: Δ Ct<br>(Ct of each miR -<br>median Ct) |                | normoxia |      |      |      |      | hypoxia 8 hrs |      |      |      |      | hypoxia 24 hrs |      |      |      |      | hypoxia 48 hrs |      |      |      |      |
|--------------------------------------------------|----------------|----------|------|------|------|------|---------------|------|------|------|------|----------------|------|------|------|------|----------------|------|------|------|------|
| WELL                                             | DETECTOR       | A        | B    | C    | D    | ave  | A             | B    | C    | D    | ave  | A              | B    | C    | D    | ave  | A              | B    | C    | D    | ave  |
| A1                                               | hsa-let-7a     | -3,1     | -4,1 | -4,3 | -4,4 | -4,0 | -4,3          | -3,7 | -4,6 | -4,2 | -4,2 | -4,5           | -3,8 | -4,4 | -4,4 | -4,3 | -4,2           | -4,4 | -5,1 | -5,4 | -4,8 |
| A2                                               | cel-lin-4      | 11,7     | 13,4 | 11,7 | 11,6 | 12,1 | 11,4          | 12,2 | 7,7  | 11,5 | 10,7 | 13,1           | 13,1 | 9,7  | 11,1 | 11,8 | 13,6           | 12,3 | 9,8  | 9,5  | 11,3 |
| A3                                               | control        | 1,2      | 1,1  | 3,7  | 2,9  | 2,2  | 3,2           | 3,0  | 3,0  | 3,3  | 3,1  | 3,1            | 3,1  | 4,8  | 4,6  | 3,9  | 4,6            | 5,2  | 5,8  | 5,5  | 5,3  |
| A4                                               | hsa-miR-9      | 9,1      | 9,1  | 7,5  | 8,5  | 8,5  | 9,4           | 8,6  | 4,4  | 5,6  | 7,0  | 9,7            | 9,5  | 7,3  | 6,6  | 8,3  | 8,7            | 7,7  | 6,7  | 6,3  | 7,3  |
| A5                                               | hsa-miR-9*     | 10,9     | 14,8 | 11,2 | 10,7 | 11,9 | 11,9          | 12,7 | 8,6  | 11,3 | 11,1 | 11,9           | 13,7 | 11,3 | 10,2 | 11,8 | 10,9           | 10,5 | 12,1 | 11,1 | 11,2 |
| A6                                               | hsa-miR-10a    | -0,2     | -0,6 | -0,3 | -0,2 | -0,3 | -0,6          | -0,2 | -0,3 | -0,3 | -0,3 | -0,5           | -0,5 | -0,8 | -0,5 | -0,6 | -1,0           | -1,3 | -1,0 | -1,2 | -1,1 |
| A7                                               | control        | -1,6     | -2,0 | -1,1 | -1,2 | -1,4 | -1,6          | -1,1 |      |      | -1,3 | -1,6           | -1,9 | -1,5 | -1,3 | -1,6 | -1,9           | -2,0 | -1,3 | -1,5 | -1,7 |
| A8                                               | hsa-miR-15a    | -2,7     | -2,9 | 0,0  | -0,2 | -1,5 | -3,0          | -3,1 | -0,3 | -0,2 | -1,6 | -1,5           | -1,6 | -0,4 | -0,3 | -1,0 | -2,4           | -2,3 | -0,3 | -0,3 | -1,3 |
| A9                                               | hsa-miR-15b    | -2,8     | -2,8 | -2,5 | -2,6 | -2,7 | -3,1          | -2,7 | -3,1 | -3,1 | -3,0 | -3,0           | -2,8 | -2,8 | -2,7 | -2,8 | -3,2           | -3,1 | -2,4 | -2,6 | -2,8 |
| A10                                              | hsa-miR-16     | -4,5     | -4,4 | -3,7 | -3,8 | -4,1 | -4,5          | -4,6 | -4,1 | -4,2 | -4,3 | -4,0           | -4,6 | -4,1 | -4,3 | -4,3 | -4,8           | -4,8 | -3,6 | -4,3 | -4,4 |
| A11                                              | hsa-miR-17-3p  | 2,2      | 2,4  | 2,3  | 2,1  | 2,3  | 2,4           | 2,5  | 1,4  | 1,9  | 2,0  | 2,5            | 1,8  | 2,1  | 2,2  | 2,2  | 2,6            | 2,2  | 1,8  | 1,5  | 2,0  |
| A12                                              | hsa-miR-17-5p  | -3,6     |      | -4,6 | -4,2 | -4,1 | -3,9          | -3,4 | -5,3 | -4,4 | -4,3 | -3,8           | -3,6 | -4,5 | -5,0 | -4,2 | -3,6           | -3,2 | -4,1 | -4,3 | -3,8 |
| B1                                               | ath-miR159a    | 13,7     | 11,0 | 12,1 | 12,8 | 12,4 | 14,4          | 11,6 | 11,9 | 10,8 | 12,2 | 12,3           | 15,0 | 9,7  | 12,3 | 12,3 | 14,3           | 14,9 | 11,6 | 11,9 | 13,2 |
| B2                                               | hsa-miR-19a    | -3,8     | -3,8 | -4,3 | -3,7 | -3,9 | -2,5          | -1,5 | -3,0 | -2,0 | -2,2 | -4,1           | -3,0 | -0,9 | -1,2 | -2,3 | -4,0           | -3,0 | -2,8 | -1,0 | -2,7 |
| B3                                               | control        | -4,4     | -4,6 | -5,5 | -5,3 | -5,0 | -4,8          | -4,7 |      |      | -4,7 | -4,0           | -4,1 | -5,5 | -5,3 | -4,7 | -4,4           | -4,7 | -5,3 | -5,4 | -4,9 |
| B4                                               | hsa-miR-20     | -2,7     | -3,7 | -3,1 | -2,9 | -3,1 | -2,7          | -3,2 | -2,1 | -2,5 | -2,6 | -2,6           | -2,1 | -1,9 | -2,2 | -2,2 | -2,3           | -0,7 | -2,7 | -2,0 | -1,9 |
| B5                                               | hsa-miR-21     | -7,0     | -7,6 | -6,4 | -6,1 | -6,8 | -6,9          | -6,9 | -7,3 | -6,8 | -7,0 | -6,9           | -6,9 | -6,3 | -6,4 | -6,6 | -7,0           | -7,1 | -6,9 | -6,6 | -6,9 |
| B6                                               | control        | -2,1     | -2,2 | -1,6 | -1,1 | -1,7 | -2,2          | -2,3 |      |      | -2,2 | -1,8           | -1,7 | -1,2 | -1,0 | -1,5 | -2,3           | -2,1 | -1,0 | -1,3 | -1,7 |
| B7                                               | hsa-miR-23a    | -4,5     | -5,0 | -3,8 | -3,8 | -4,3 | -4,8          | -4,5 | -4,3 | -3,9 | -4,4 | -5,2           | -5,1 | -2,8 | -3,0 | -4,0 | -5,2           | -4,9 | -3,9 | -3,9 | -4,5 |
| B8                                               | hsa-miR-23b    | -0,5     | -1,3 | -0,8 | -0,2 | -0,7 | -1,0          | -1,2 | -0,7 | -0,6 | -0,9 | -0,4           | -0,9 | -0,5 | -0,4 | -0,6 | -0,9           | -0,9 | -0,3 | 0,0  | -0,5 |
| B9                                               | control        | -4,6     | -4,4 | -5,2 | -4,9 | -4,8 | -5,3          | -4,5 |      |      | -4,9 | -4,9           | -4,5 | -4,9 | -4,6 | -4,7 | -4,7           | -5,1 | -4,8 | -4,8 | -4,8 |
| B10                                              | hsa-miR-25     | -1,4     | -1,6 | -3,1 | -2,1 | -2,0 | -1,6          | -1,3 | -2,3 | -2,5 | -1,9 | -1,6           | -1,4 | -2,1 | -2,2 | -1,8 | -1,6           | -1,6 | -2,2 | -2,0 | -1,9 |
| B11                                              | hsa-miR-26a    | -2,1     | -2,0 | -2,1 | -2,3 | -2,1 | -2,5          | -3,0 | -2,3 | -2,6 | -2,6 | -2,8           | -2,4 | -2,4 | -2,6 | -2,5 | -2,9           | -3,0 | -2,8 | -3,0 | -2,9 |
| B12                                              | hsa-miR-26b    | -0,7     | -0,6 | -1,1 | -0,7 | -0,8 | -1,0          | -0,7 | -0,6 | -1,6 | -1,0 | -1,5           | -0,6 | -1,6 | -2,1 | -1,5 | -1,4           | -1,5 | -1,3 | -1,2 | -1,4 |
| C1                                               | hsa-miR-27a    | -3,1     | -3,4 | -2,6 | -3,1 | -3,0 | -3,1          | -2,9 | -3,4 | -3,4 | -3,2 | -3,2           | -3,5 | -3,5 | -3,9 | -3,5 | -3,2           | -3,2 | -3,1 | -3,1 | -3,2 |
| C2                                               | hsa-miR-27b    | -1,6     | -2,1 | -0,1 | 0,0  | -1,0 | -1,5          | -1,1 | -0,5 | -0,5 | -0,9 | -2,0           | -2,6 | -0,8 | -0,9 | -1,6 | -2,2           | -2,0 | -0,5 | -0,6 | -1,3 |
| C3                                               | hsa-miR-28     | 0,0      | 0,0  | 0,3  | 0,3  | 0,1  | -0,2          | 0,0  | -0,2 | 0,0  | -0,1 | 0,3            | 0,3  | 0,2  | 0,2  | 0,2  | 0,1            | -0,1 | 0,0  | -0,2 | -0,1 |
| C4                                               | hsa-miR-29a    | -4,5     | -5,1 | -4,5 | -4,7 | -4,7 | -4,3          | -5,1 | -4,6 | -4,3 | -4,6 | -5,5           | -4,8 | -4,4 | -4,6 | -4,8 | -5,6           | -5,1 | -5,0 | -4,8 | -5,1 |
| C5                                               | hsa-miR-29b    | -3,4     | -3,7 | -3,4 | -3,5 | -3,5 | -3,5          | -3,2 | -4,1 | -3,2 | -3,5 | -3,2           | -3,6 | -2,9 | -3,4 | -3,3 | -3,4           | -3,5 | -3,3 | -3,4 | -3,4 |
| C6                                               | hsa-miR-29c    | -4,6     | -5,1 | -3,5 | -4,8 | -4,5 | -4,8          | -4,9 | -4,9 | -4,3 | -4,7 | -5,4           | -4,5 | -4,8 | -4,5 | -4,8 | -5,1           | -4,9 | -4,8 | -5,1 | -5,0 |
| C7                                               | hsa-miR-30a-3p | 0,0      | -0,1 | 0,0  | -0,4 | -0,1 | 0,6           | -0,2 | -0,6 | -0,1 | -0,1 | -0,2           | -0,1 | -0,4 | -0,2 | -0,2 | -0,3           | 0,1  | 0,2  | -0,3 | -0,1 |
| C8                                               | hsa-miR-30b    | -3,0     | -2,8 | -2,5 | -2,6 | -2,7 | -2,6          | -3,1 | -2,0 | -2,1 | -2,5 | -2,5           | -2,5 | -2,4 | -2,3 | -2,5 | -3,1           | -2,8 | -2,3 | -2,6 | -2,7 |
| C9                                               | hsa-miR-30c    | -2,5     | -2,7 | -2,0 | -1,9 | -2,3 | -2,6          | -2,3 | -1,7 | -1,8 | -2,1 | -2,1           | -2,7 | -2,3 | -2,2 | -2,3 | -2,5           | -2,7 | -2,1 | -2,2 | -2,3 |
| C10                                              | hsa-miR-30d    | -0,3     | -0,7 | 0,8  | 1,3  | 0,3  | -0,2          | 0,0  | 0,2  | 1,1  | 0,3  | -0,4           | -0,5 | 0,3  | 0,2  | -0,1 | -1,8           | -0,7 | 0,0  | 0,0  | -0,6 |
| C11                                              | hsa-miR-30e    | 0,7      | 1,3  | 1,3  | 1,6  | 1,2  | 1,4           |      | 1,3  | 1,8  | 1,5  | 1,7            | 1,5  | 2,6  | 2,7  | 2,1  | 0,3            | 1,3  | 1,9  | 1,9  | 1,3  |
| C12                                              | hsa-miR-31     | -3,0     | -3,2 | -2,6 | -3,1 | -3,0 | -3,4          | -3,3 | -3,5 | -3,4 | -3,4 | -3,2           | -2,9 | -3,3 | -3,2 | -3,1 | -3,2           | -2,7 | -3,1 | -3,7 | -3,2 |
| D1                                               | control        | 0,4      | 0,5  | 2,5  | 3,4  | 1,7  | 1,4           | 1,8  |      |      | 1,6  | -0,2           | 1,8  | 2,4  | 2,7  | 1,7  | 1,5            | 1,2  | 2,5  | 2,5  | 1,9  |
| D2                                               | control        | 3,0      | 2,9  | 4,0  | 4,1  | 3,5  | 3,6           | 3,7  |      |      | 3,6  | 4,1            | 3,2  | 3,8  | 3,5  | 3,6  | 3,4            | 2,6  | 3,4  | 3,1  | 3,1  |
| D3                                               | hsa-miR-34a    | -2,7     | -3,2 | -3,0 | -3,0 | -3,0 | -2,9          | -3,6 | -3,1 | -3,0 | -3,2 | -3,4           | -3,8 | -3,0 | -3,1 | -3,3 | -4,0           | -4,5 | -3,5 | -3,7 | -3,9 |
| D4                                               | hsa-miR-34b    | 9,5      | 9,0  | 8,9  | 8,7  | 9,0  | 9,4           | 9,6  | 7,8  | 6,1  | 8,2  | 8,7            | 9,2  | 9,3  | 9,7  | 9,3  | 7,9            | 8,9  | 7,0  | 6,9  | 7,7  |
| D5                                               | hsa-miR-34c    | 10,5     | 9,8  | 7,7  | 7,7  | 8,9  | 10,7          | 10,7 | 6,3  | 7,1  | 8,7  | 9,5            | 8,8  | 8,5  | 9,3  | 9,0  | 8,4            | 7,9  | 7,4  | 7,5  | 7,8  |
| D6                                               | hsa-miR-92     | -2,5     | -2,5 | -3,1 | -3,2 | -2,8 | -2,8          | -3,0 | -3,6 | -3,6 | -3,3 | -2,9           | -2,8 | -3,4 | -3,4 | -3,1 | -3,0           | -3,3 | -3,3 | -3,4 | -3,3 |
| D7                                               | control        | -4,5     | -3,9 | -4,0 | -3,9 | -4,1 | -3,5          | -3,4 |      |      | -3,5 | -3,1           | -2,6 | -4,4 | -4,1 | -3,5 | -3,3           | -2,8 | -3,8 | -3,8 | -3,4 |
| D8                                               | hsa-miR-95     | 8,0      | 8,5  | 9,2  | 9,2  | 8,7  | 8,6           | 8,9  | 8,1  | 9,7  | 8,8  | 8,1            | 8,7  | 9,1  | 8,9  | 8,7  | 7,0            | 7,6  | 8,9  | 9,0  | 8,1  |
| D9                                               | hsa-miR-96     | 10,1     | 9,6  | 12,2 | 10,8 | 10,7 | 9,5           | 9,3  | 11,1 | 9,2  | 9,8  | 9,9            | 10,0 | 11,2 | 12,1 | 10,8 | 9,1            | 8,7  | 10,0 | 10,8 | 9,6  |
| D10                                              | hsa-miR-98     | -0,8     | -0,4 | -0,3 | 0,0  | -0,4 | -0,6          | -0,6 | 0,3  | 0,0  | -0,2 | -0,1           | -0,3 | 0,4  | 0,5  | 0,1  | -1,2           | -0,7 | 0,4  | 0,6  | -0,2 |
| D11                                              | hsa-miR-99a    | -3,6     | -3,4 | -2,6 | -3,0 | -3,2 | -4,3          | -3,7 | -3,6 | -3,3 | -3,7 | -3,6           | -3,5 | -3,4 | -3,5 | -3,5 | -3,3           | -3,3 | -3,1 | -3,2 | -3,2 |
| D12                                              | control        | 1,1      | 0,8  | 3,1  | 2,7  | 1,9  | 0,6           | 0,5  |      |      | 0,5  | 1,1            | 1,9  | 2,3  | 2,5  | 1,9  | 0,6            | 0,8  | 2,0  | 2,1  | 1,4  |
| E1                                               | hsa-miR-100    | -3,8     | -3,9 | -4,6 | -4,1 | -4,1 | -4,2          | -4,0 | -4,9 | -4,3 | -4,3 | -4,2           | -4,1 | -4,5 | -4,4 | -4,3 | -3,5           | -4,0 | -4,0 | -3,9 | -3,9 |
| E2                                               | control        | 1,3      | 1,1  | 1,4  | 1,7  | 1,4  | 0,7           | 1,1  |      |      | 0,9  | 0,8            | 0,6  | 0,4  | 0,3  | 0,5  | 0,9            | 0,9  | 0,7  | 0,7  | 0,8  |
| E3                                               | hsa-miR-103    | -2,8     | -3,2 | -2,8 | -2,9 | -2,9 | -3,3          | -3,2 | -3,6 | -3,9 | -3,5 | -3,1           | -3,2 | -2,6 | -2,7 | -2,9 | -3,2           | -3,7 | -2,8 | -3,1 | -3,2 |
| E4                                               | hsa-miR-104    | 11,0     | 13,2 | 9,2  | 8,7  | 10,6 | 13,9          | 12,7 | 8,9  | 8,6  | 11,0 | 15,5           | 12,6 | 9,2  | 10,0 | 11,8 | 12,8           | 15,2 | 8,3  | 7,3  | 10,9 |
| E5                                               | hsa-miR-105    | 10,9     | 12,5 | 10,9 | 13,1 | 11,8 | 14,2          | 11,9 | 12,5 | 15,6 | 13,5 | 11,3           | 15,0 | 13,6 | 13,4 | 13,3 | 12,5           | 12,5 | 11,9 | 9,7  | 11,7 |
| E6                                               | hsa-miR-106a   | -3,6     | -3,5 | -2,2 | -2,8 | -3,0 | -3,4          | -2,7 | -3,2 | -3,1 | -3,1 | -3,8           | -2,8 | -2,7 | -2,7 | -3,0 | -2,9           | -2,5 | -2,6 | -2,7 | -2,7 |
| E7                                               | control        | -2,9     | -3,2 | -2,7 | -3,0 | -2,9 | -3,1          | -3,2 |      |      | -3,2 | -1,5           | -2,8 | -1,1 | -2,2 | -1,9 | -2,8           | -2,9 | -2,5 | -2,8 | -2,7 |
| E8                                               | hsa-miR-107    | 2,1      | 1,9  | 2,6  | 2,8  | 2,3  | 2,8           | 3,2  | 2,5  | 3,0  | 2,9  | 2,4            | 3,8  | 2,9  | 4,6  | 3,4  | 3,3            | 3,3  | 2,9  | 2,8  | 3,1  |
| E9                                               | hsa-miR-122a   | 12,9     | 13,0 | 10,8 | 14,0 | 12,7 | 14,4          | 14,7 | 11,1 | 13,8 | 13,5 | 12,3           | 15,0 | 11,6 | 15,4 | 13,6 | 15,4           | 13,8 | 13,5 | 13,3 | 14,0 |
| E10                                              | hsa-miR-124a   | 9,6      | 11,7 | 10,0 | 8,8  | 10,0 | 10,3          | 10,3 | 7,1  | 9,5  | 9,3  | 12,3           | 14,0 | 9,6  | 7,8  | 10,9 | 11,7           | 14,1 | 5,6  | 6,7  | 9,5  |
| E11                                              | hsa-miR-124b   | 6,3      | 5,9  | 9,9  | 9,5  | 7,9  | 10,0          | 9,5  | 8,8  | 8,6  | 9,2  | 8,5            | 9,3  | 6,8  | 6,7  | 7,8  | 8,8            | 9,2  | 4,4  | 3,5  | 6,5  |
| E12                                              | hsa-miR-125a   | -1,6     | -1,8 | -1,0 | -0,6 | -1,2 | -2,0          | -2,6 | -1,3 | -1,4 | -1,8 | -2,9           | -1,9 | -1,8 | -1,6 | -2,0 | -2,4           | -2,4 | -1,9 | -2,6 | -2,3 |
| F1                                               | hsa-miR-125b   | -3,0     | -3,6 | -1,4 | -1,6 | -2,4 | -3,0          | -2,7 | -2,3 | -2,1 | -2,5 | -2,5           | -2,8 | -1,6 | -1,2 | -2,0 | -2,5           | -3,2 | -1,3 | -2,1 | -2,3 |
| F2                                               | hsa-miR-126    | -6,3     | -6,0 | -5,1 | -5,2 | -5,6 | -6,1          | -5,9 | -5,3 | -5,1 | -5,6 | -6,2           | -6,0 | -5,9 | -6,0 | -6,0 | -6,3           | -6,0 | -5,1 | -5,2 | -5,6 |
| F3                                               | control        | -4,6     | -3,9 | -4,9 | -4,3 | -4,4 | -4,2          | -4,0 |      |      | -4,1 | -3,8           | -3,4 | -4,3 | -4,2 | -3,9 | -3,6           | -4,1 | -4,6 | -4,4 | -4,2 |
| F4                                               | hsa-miR-127    | 1,2      | 1,3  | 1,3  | 0,8  | 1,2  | 1,2           | 0,9  | 0,7  | 0,8  | 0,9  | 0,8            | 0,7  | 1,1  | 1,2  | 1,0  | 0,9            | 0,4  | 1,8  | 0,6  | 0,9  |
| F5                                               | hsa-miR-128a   | 3,8      | 3,4  | 3,9  | 4,2  | 3,8  | 3,6           | 3,8  | 3,8  | 4,3  | 3,9  | 3,9            | 4,1  | 3,5  | 4,2  | 3,9  | 4,9            | 4,6  | 3,7  | 4,0  | 4,3  |

| PLATE 1: ΔΔ Ct<br>(Δ Ct sample -<br>media Δ Ct<br>normoxia) |                | normoxia |      |      |      |     | hypoxia 8 hrs |      |      |      |      | hypoxia 24 hrs |      |      |      |      | hypoxia 48 hrs |      |      |      |      |
|-------------------------------------------------------------|----------------|----------|------|------|------|-----|---------------|------|------|------|------|----------------|------|------|------|------|----------------|------|------|------|------|
| WELL                                                        | DETECTOR       | A        | B    | C    | D    | ave | A             | B    | C    | D    | ave  | A              | B    | C    | D    | ave  | A              | B    | C    | D    | ave  |
| A1                                                          | hsa-let-7a     | 0,9      | -0,1 | -0,3 | -0,5 | 0,0 | -0,3          | 0,3  | -0,7 | -0,3 | -0,2 | -0,5           | 0,2  | -0,4 | -0,5 | -0,3 | -0,2           | -0,4 | -1,1 | -1,4 | -0,8 |
| A2                                                          | cel-lin-4      | -0,4     | 1,3  | -0,4 | -0,5 | 0,0 | -0,7          | 0,1  | -4,4 | -0,6 | -1,4 | 1,0            | 1,0  | -2,4 | -0,9 | -0,3 | 1,5            | 0,2  | -2,3 | -2,6 | -0,8 |
| A3                                                          | control        | -1,0     | -1,1 | 1,5  | 0,7  | 0,0 | 1,0           | 0,7  | 0,8  | 1,0  | 0,9  | 0,9            | 0,8  | 2,6  | 2,3  | 1,7  | 2,3            | 2,9  | 3,5  | 3,3  | 3,0  |
| A4                                                          | hsa-miR-9      | 0,6      | 0,5  | -1,1 | -0,1 | 0,0 | 0,9           | 0,1  | -4,2 | -2,9 | -1,5 | 1,2            | 0,9  | -1,2 | -1,9 | -0,2 | 0,1            | -0,8 | -1,8 | -2,2 | -1,2 |
| A5                                                          | hsa-miR-9*     | -1,0     | 2,9  | -0,7 | -1,2 | 0,0 | 0,0           | 0,8  | -3,3 | -0,6 | -0,8 | 0,0            | 1,8  | -0,6 | -1,7 | -0,1 | -1,0           | -1,4 | 0,2  | -0,8 | -0,7 |
| A6                                                          | hsa-miR-10a    | 0,1      | -0,3 | 0,0  | 0,1  | 0,0 | -0,3          | 0,1  | 0,0  | 0,0  | 0,0  | -0,2           | -0,3 | -0,5 | -0,2 | -0,3 | -0,7           | -1,0 | -0,7 | -0,9 | -0,8 |
| A7                                                          | control        | -0,1     | -0,5 | 0,4  | 0,3  | 0,0 | -0,2          | 0,4  |      |      | 0,1  | -0,1           | -0,4 | -0,1 | 0,1  | -0,1 | -0,5           | -0,6 | 0,1  | -0,1 | -0,2 |
| A8                                                          | hsa-miR-15a    | -1,2     | -1,4 | 1,4  | 1,3  | 0,0 | -1,5          | -1,6 | 1,2  | 1,3  | -0,2 | 0,0            | -0,1 | 1,0  | 1,1  | 0,5  | -0,9           | -0,8 | 1,2  | 1,1  | 0,2  |
| A9                                                          | hsa-miR-15b    | -0,1     | -0,1 | 0,2  | 0,1  | 0,0 | -0,5          | 0,0  | -0,4 | -0,4 | -0,3 | -0,3           | -0,1 | -0,1 | 0,0  | -0,1 | -0,5           | -0,4 | 0,3  | 0,1  | -0,1 |
| A10                                                         | hsa-miR-16     | -0,4     | -0,3 | 0,4  | 0,3  | 0,0 | -0,4          | -0,5 | 0,0  | -0,1 | -0,2 | 0,0            | -0,5 | 0,0  | -0,2 | -0,2 | -0,7           | -0,8 | 0,5  | -0,2 | -0,3 |
| A11                                                         | hsa-miR-17-3p  | -0,1     | 0,2  | 0,1  | -0,2 | 0,0 | 0,1           | 0,3  | -0,9 | -0,4 | -0,2 | 0,3            | -0,4 | -0,2 | 0,0  | -0,1 | 0,3            | -0,1 | -0,5 | -0,7 | -0,2 |
| A12                                                         | hsa-miR-17-5p  | 0,6      |      | -0,5 | -0,1 | 0,0 | 0,2           | 0,7  | -1,2 | -0,3 | -0,1 | 0,3            | 0,5  | -0,4 | -0,9 | -0,1 | 0,5            | 0,9  | 0,0  | -0,2 | 0,3  |
| B1                                                          | ath-miR159a    | 1,3      | -1,4 | -0,3 | 0,4  | 0,0 | 2,0           | -0,8 | -0,5 | -1,6 | -0,2 | -0,1           | 2,6  | -2,7 | -0,1 | -0,1 | 1,9            | 2,4  | -0,8 | -0,6 | 0,7  |
| B2                                                          | hsa-miR-19a    | 0,1      | 0,1  | -0,4 | 0,2  | 0,0 | 1,4           | 2,4  | 0,9  | 1,8  | 1,6  | -0,2           | 0,8  | 3,0  | 2,7  | 1,6  | -0,1           | 0,9  | 1,1  | 2,9  | 1,2  |
| B3                                                          | control        | 0,5      | 0,3  | -0,5 | -0,4 | 0,0 | 0,2           | 0,3  |      |      | 0,2  | 0,9            | 0,9  | -0,5 | -0,4 | 0,2  | 0,6            | 0,3  | -0,3 | -0,5 | 0,0  |
| B4                                                          | hsa-miR-20     | 0,4      | -0,6 | 0,0  | 0,2  | 0,0 | 0,4           | -0,1 | 1,0  | 0,6  | 0,5  | 0,5            | 1,0  | 1,2  | 0,9  | 0,9  | 0,8            | 2,4  | 0,4  | 1,1  | 1,2  |
| B5                                                          | hsa-miR-21     | -0,2     | -0,9 | 0,4  | 0,6  | 0,0 | -0,1          | -0,1 | -0,5 | -0,1 | -0,2 | -0,2           | -0,1 | 0,5  | 0,4  | 0,1  | -0,2           | -0,4 | -0,1 | 0,2  | -0,1 |
| B6                                                          | control        | -0,3     | -0,5 | 0,2  | 0,6  | 0,0 | -0,5          | -0,5 |      |      | -0,5 | -0,1           | 0,0  | 0,5  | 0,7  | 0,3  | -0,6           | -0,4 | 0,7  | 0,4  | 0,0  |
| B7                                                          | hsa-miR-23a    | -0,3     | -0,7 | 0,5  | 0,5  | 0,0 | -0,5          | -0,2 | 0,0  | 0,3  | -0,1 | -0,9           | -0,8 | 1,4  | 1,2  | 0,2  | -0,9           | -0,6 | 0,3  | 0,4  | -0,2 |
| B8                                                          | hsa-miR-23b    | 0,2      | -0,7 | -0,1 | 0,5  | 0,0 | -0,3          | -0,5 | 0,0  | 0,1  | -0,2 | 0,3            | -0,2 | 0,2  | 0,3  | 0,1  | -0,2           | -0,2 | 0,4  | 0,7  | 0,1  |
| B9                                                          | control        | 0,2      | 0,3  | -0,4 | -0,1 | 0,0 | -0,6          | 0,2  |      |      | -0,2 | -0,1           | 0,2  | -0,1 | 0,2  | 0,0  | 0,1            | -0,4 | 0,0  | 0,0  | -0,1 |
| B10                                                         | hsa-miR-25     | 0,6      | 0,4  | -1,0 | -0,1 | 0,0 | 0,4           | 0,7  | -0,3 | -0,4 | 0,1  | 0,4            | 0,7  | 0,0  | -0,1 | 0,2  | 0,4            | 0,4  | -0,2 | 0,1  | 0,2  |
| B11                                                         | hsa-miR-26a    | 0,0      | 0,1  | 0,0  | -0,1 | 0,0 | -0,4          | -0,8 | -0,2 | -0,4 | -0,5 | -0,6           | -0,3 | -0,3 | -0,5 | -0,4 | -0,8           | -0,9 | -0,7 | -0,9 | -0,8 |
| B12                                                         | hsa-miR-26b    | 0,0      | 0,2  | -0,3 | 0,1  | 0,0 | -0,2          | 0,1  | 0,2  | -0,9 | -0,2 | -0,8           | 0,1  | -0,8 | -1,3 | -0,7 | -0,7           | -0,7 | -0,6 | -0,4 | -0,6 |
| C1                                                          | hsa-miR-27a    | -0,1     | -0,4 | 0,5  | 0,0  | 0,0 | -0,1          | 0,1  | -0,4 | -0,4 | -0,2 | -0,1           | -0,5 | -0,4 | -0,8 | -0,5 | -0,1           | -0,2 | -0,1 | -0,1 | -0,1 |
| C2                                                          | hsa-miR-27b    | -0,6     | -1,1 | 0,8  | 0,9  | 0,0 | -0,5          | -0,1 | 0,5  | 0,5  | 0,1  | -1,0           | -1,6 | 0,2  | 0,0  | -0,6 | -1,2           | -1,0 | 0,4  | 0,4  | -0,4 |
| C3                                                          | hsa-miR-28     | -0,1     | -0,1 | 0,1  | 0,1  | 0,0 | -0,3          | -0,1 | -0,3 | -0,2 | -0,2 | 0,2            | 0,1  | 0,0  | 0,0  | 0,1  | -0,2           | -0,2 | -0,2 | -0,3 | -0,2 |
| C4                                                          | hsa-miR-29a    | 0,2      | -0,4 | 0,2  | 0,0  | 0,0 | 0,4           | -0,4 | 0,1  | 0,4  | 0,1  | -0,8           | -0,1 | 0,3  | 0,1  | -0,1 | -0,9           | -0,4 | -0,3 | -0,1 | -0,4 |
| C5                                                          | hsa-miR-29b    | 0,1      | -0,2 | 0,1  | 0,0  | 0,0 | 0,0           | 0,3  | -0,6 | 0,3  | 0,0  | 0,3            | -0,1 | 0,6  | 0,1  | 0,2  | 0,1            | 0,0  | 0,2  | 0,1  | 0,1  |
| C6                                                          | hsa-miR-29c    | -0,1     | -0,6 | 1,0  | -0,3 | 0,0 | -0,3          | -0,4 | -0,4 | 0,2  | -0,2 | -0,9           | 0,0  | -0,3 | 0,0  | 0,3  | -0,6           | -0,4 | -0,3 | -0,6 | -0,5 |
| C7                                                          | hsa-miR-30a-3p | 0,1      | 0,1  | 0,1  | -0,3 | 0,0 | 0,7           | -0,1 | -0,5 | 0,0  | 0,0  | -0,1           | 0,0  | -0,2 | -0,1 | -0,1 | -0,2           | 0,2  | 0,3  | -0,2 | 0,0  |
| C8                                                          | hsa-miR-30b    | -0,3     | -0,1 | 0,2  | 0,2  | 0,0 | 0,1           | -0,4 | 0,7  | 0,6  | 0,3  | 0,2            | 0,2  | 0,3  | 0,4  | 0,3  | -0,3           | -0,1 | 0,4  | 0,1  | 0,0  |
| C9                                                          | hsa-miR-30c    | -0,2     | -0,4 | 0,3  | 0,4  | 0,0 | -0,3          | 0,0  | 0,6  | 0,5  | 0,2  | 0,2            | -0,4 | 0,0  | 0,1  | 0,0  | -0,2           | -0,4 | 0,2  | 0,1  | -0,1 |
| C10                                                         | hsa-miR-30d    | -0,5     | -1,0 | 0,6  | 1,0  | 0,0 | -0,5          | -0,2 | -0,1 | 0,9  | 0,0  | -0,6           | -0,8 | 0,0  | 0,0  | -0,3 | -2,1           | -1,0 | -0,2 | -0,2 | -0,9 |
| C11                                                         | hsa-miR-30e    | -0,5     | 0,1  | 0,1  | 0,3  | 0,0 | 0,2           |      | 0,1  | 0,6  | 0,3  | 0,4            | 0,3  | 1,4  | 1,4  | 0,9  | -1,0           | 0,1  | 0,7  | 0,7  | 0,1  |
| C12                                                         | hsa-miR-31     | 0,0      | -0,3 | 0,4  | -0,1 | 0,0 | -0,4          | -0,3 | -0,6 | -0,5 | -0,5 | -0,3           | 0,1  | -0,3 | -0,3 | -0,2 | -0,3           | 0,2  | -0,2 | -0,7 | -0,2 |
| D1                                                          | control        | -1,3     | -1,2 | 0,8  | 1,7  | 0,0 | -0,3          | 0,0  |      |      | -0,1 | -1,9           | 0,1  | 0,7  | 1,0  | 0,0  | -0,2           | -0,5 | 0,8  | 0,8  | 0,2  |
| D2                                                          | control        | -0,5     | -0,6 | 0,5  | 0,6  | 0,0 | 0,1           | 0,2  |      |      | 0,1  | 0,6            | -0,3 | 0,3  | 0,0  | 0,1  | -0,1           | -0,9 | -0,1 | -0,4 | -0,4 |
| D3                                                          | hsa-miR-34a    | 0,3      | -0,2 | 0,0  | -0,1 | 0,0 | 0,0           | -0,7 | -0,1 | -0,1 | -0,2 | -0,5           | -0,9 | 0,0  | -0,1 | -0,4 | -1,0           | -1,6 | -0,5 | -0,8 | -1,0 |
| D4                                                          | hsa-miR-34b    | 0,5      | 0,0  | -0,1 | -0,3 | 0,0 | 0,4           | 0,6  | -1,2 | -3,0 | -0,8 | -0,3           | 0,2  | 0,3  | 0,7  | 0,3  | -1,1           | -0,1 | -2,0 | -2,1 | -1,3 |
| D5                                                          | hsa-miR-34c    | 1,6      | 0,9  | -1,2 | -1,3 | 0,0 | 1,8           | 1,8  | -2,7 | -1,8 | -0,2 | 0,6            | -0,1 | -0,4 | 0,4  | 0,1  | -0,5           | -1,0 | -1,5 | -1,5 | -1,1 |
| D6                                                          | hsa-miR-92     | 0,3      | 0,3  | -0,3 | -0,4 | 0,0 | 0,0           | -0,2 | -0,8 | -0,8 | -0,4 | -0,1           | 0,1  | -0,6 | -0,6 | -0,3 | -0,2           | -0,5 | -0,4 | -0,6 | -0,4 |
| D7                                                          | control        | -0,4     | 0,1  | 0,1  | 0,2  | 0,0 | 0,6           | 0,6  |      |      | 0,6  | 1,0            | 1,4  | -0,3 | 0,0  | 0,5  | 0,8            | 1,2  | 0,2  | 0,3  | 0,6  |
| D8                                                          | hsa-miR-95     | -0,7     | -0,2 | 0,4  | 0,5  | 0,0 | -0,1          | 0,2  | -0,6 | 1,0  | 0,1  | -0,7           | 0,0  | 0,4  | 0,2  | 0,0  | -1,7           | -1,1 | 0,2  | 0,2  | -0,6 |
| D9                                                          | hsa-miR-96     | -0,5     | -1,1 | 1,5  | 0,1  | 0,0 | -1,2          | -1,4 | 0,5  | -1,5 | -0,9 | -0,8           | -0,6 | 0,6  | 1,5  | 0,2  | -1,5           | -2,0 | -0,7 | 0,2  | -1,0 |
| D10                                                         | hsa-miR-98     | -0,4     | 0,0  | 0,1  | 0,4  | 0,0 | -0,2          | -0,3 | 0,7  | 0,4  | 0,2  | 0,2            | 0,0  | 0,8  | 0,9  | 0,5  | -0,9           | -0,3 | 0,7  | 1,0  | 0,1  |
| D11                                                         | hsa-miR-99a    | -0,5     | -0,3 | 0,6  | 0,1  | 0,0 | -1,1          | -0,5 | -0,4 | -0,1 | -0,6 | -0,5           | -0,3 | -0,3 | -0,3 | -0,3 | -0,2           | -0,1 | 0,1  | 0,0  | -0,1 |
| D12                                                         | control        | -0,8     | -1,1 | 1,2  | 0,7  | 0,0 | -1,3          | -1,5 |      |      | -1,4 | -0,9           | 0,0  | 0,3  | 0,6  | 0,0  | -1,3           | -1,1 | 0,0  | 0,2  | -0,6 |
| E1                                                          | hsa-miR-100    | 0,3      | 0,2  | -0,5 | 0,0  | 0,0 | 0,0           | 0,2  | -0,8 | -0,2 | -0,2 | -0,1           | 0,1  | -0,4 | -0,2 | -0,2 | 0,6            | 0,1  | 0,2  | 0,2  | 0,3  |
| E2                                                          | control        | -0,1     | -0,3 | 0,0  | 0,3  | 0,0 | -0,7          | -0,2 |      |      | -0,5 | -0,6           | -0,8 | -1,0 | -1,1 | -0,8 | -0,5           | -0,5 | -0,7 | -0,7 | -0,6 |
| E3                                                          | hsa-miR-103    | 0,1      | -0,3 | 0,2  | 0,0  | 0,0 | -0,4          | -0,3 | -0,7 | -1,0 | -0,6 | -0,1           | -0,3 | 0,3  | 0,2  | 0,0  | -0,3           | -0,8 | 0,2  | -0,2 | -0,3 |
| E4                                                          | hsa-miR-104    | 0,5      | 2,7  | -1,3 | -1,8 | 0,0 | 3,4           | 2,1  | -1,7 | -2,0 | 0,4  | 4,9            | 2,0  | -1,4 | -0,5 | 1,2  | 2,3            | 4,6  | -2,3 | -3,3 | 0,3  |
| E5                                                          | hsa-miR-105    | -0,9     | 0,6  | -0,9 | 1,2  | 0,0 | 2,3           | 0,1  | 0,6  | 3,7  | 1,7  | 0,6            | 3,1  | 1,8  | 1,5  | 1,5  | 0,7            | 0,7  | 0,0  | -2,1 | -0,2 |
| E6                                                          | hsa-miR-106a   | -0,6     | -0,5 | 0,9  | 0,3  | 0,0 | -0,4          | 0,4  | -0,2 | 0,0  | -0,1 | -0,8           | 0,2  | 0,3  | 0,3  | 0,0  | 0,1            | 0,5  | 0,4  | 0,3  | 0,3  |
| E7                                                          | control        | 0,0      | -0,2 | 0,2  | 0,0  | 0,0 | -0,1          | -0,3 |      |      | -0,2 | 1,4            | 0,1  | 1,8  | 0,8  | 1,0  | 0,2            | 0,0  | 0,4  | 0,1  | 0,2  |
| E8                                                          | hsa-miR-107    | -0,2     | -0,5 | 0,2  | 0,5  | 0,0 | 0,5           | 0,9  | 0,2  | 0,6  | 0,5  | 0,0            | 1,4  | 0,6  | 2,3  | 1,1  | 1,0            | 0,9  | 0,6  | 0,5  | 0,7  |
| E9                                                          | hsa-miR-122a   | 0,2      | 0,3  | -1,9 | 1,3  | 0,0 | 1,7           | 2,0  | -1,6 | 1,1  | 0,8  | -0,4           | 2,3  | -1,0 | 2,7  | 0,9  | 2,7            | 1,2  | 0,8  | 0,6  | 1,3  |
| E10                                                         | hsa-miR-124a   | -0,4     | 1,7  | 0,0  | -1,2 | 0,0 | 0,3           | 0,3  | -2,9 | -0,5 | -0,7 | 2,3            | 4,0  | -0,4 | -2,2 | 0,9  | 1,7            | 4,1  | -4,4 | -3,3 | -0,5 |
| E11                                                         | hsa-miR-124b   | -1,6     | -2,0 | 2,0  | 1,6  | 0,0 | 2,1           | 1,6  | 0,9  | 0,7  | 1,3  | 0,5            | 1,4  | -1,2 | -1,2 | -0,1 | 0,9            | 1,3  | -3,5 | -4,4 | -1,4 |
| E12                                                         | hsa-miR-125a   | -0,3     | -0,6 | 0,2  | 0,6  | 0,0 | -0,8          | -1,3 | -0,1 | -0,2 | -0,6 | -1,6           | -0,6 | -0,5 | -0,4 | -0,8 | -1,1           | -1,2 | -0,6 | -1,4 | -1,1 |
| F1                                                          | hsa-miR-125b   | -0,6     | -1,2 | 1,0  | 0,8  | 0,0 | -0,6          | -0,3 | 0,1  | 0,3  | -0,1 | -0,1           | -0,4 | 0,8  | 1,2  | 0,4  | -0,1           | -0,8 | 1,1  | 0,3  | 0,1  |
| F2                                                          | hsa-miR-126    | -0,6     | -0,4 | 0,5  | 0,5  | 0,0 | -0,5          | -0,3 | 0,4  | 0,5  | 0,0  | -0,5           | -0,4 | -0,2 | -0,3 | -0,4 | -0,7           | -0,3 | 0,5  | 0,5  | 0,0  |
| F3                                                          | control        | -0,2     | 0,5  | -0,4 | 0,1  | 0,0 | 0,3           | 0,4  |      |      | 0,4  | 0,7            | 1,0  | 0,2  | 0,3  | 0,5  | 0,8            | 0,3  | -0,1 | 0,0  | 0,3  |
| F4                                                          | hsa-miR-127    | 0,0      | 0,1  | 0,1  | -0,3 | 0,0 | 0,0           | -0,2 | -0,5 | -0,3 | -0,2 | -0,3           | -0,4 | -0,1 | 0,0  | -0,2 | -0,3           | -0,8 | 0,6  | -0,6 | -0,3 |
| F5                                                          | hsa-miR-128a   | -0,1     | -0,4 | 0,1  | 0,4  | 0,0 | -0,2          | 0,0  | 0,0  | 0,4  | 0,1  | -0,1           | 0,3  | -0,3 | 0,3  | 0,1  | 1,1            | 0,8  | -0,1 | 0,2  | 0,5  |
| F6                                                          | hsa-miR-128b   | 0,2      | 0,1  | 0,0  | -0,4 | 0,0 | 0,7           | 0,8  | 0,0  | 0,0  | 0,3  | 0,6            | 1,1  | 0,2  |      |      |                |      |      |      |      |

| PLATE 2: raw data |               | normoxia |      |      |      |      | hypoxia 8 hrs |      |      |      |      | hypoxia 24 hrs |      |      |      |      | hypoxia 48 hrs |      |      |      |      |
|-------------------|---------------|----------|------|------|------|------|---------------|------|------|------|------|----------------|------|------|------|------|----------------|------|------|------|------|
| Ct                |               |          |      |      |      |      |               |      |      |      |      |                |      |      |      |      |                |      |      |      |      |
| WELL              | DETECTOR      | A        | B    | C    | D    | ave  | A             | B    | C    | D    | ave  | A              | B    | C    | D    | ave  | A              | B    | C    | D    | ave  |
| A1                | hsa-let-7a    | 21.3     | 21.7 | 19.1 | 19.2 | 20.3 | 21.2          | 21.2 | 21.1 | 20.8 | 21.0 | 20.6           | 21.1 | 21.3 | 20.6 | 20.9 | 20.1           | 20.2 | 22.1 | 21.6 | 21.0 |
| A2                | hsa-miR-16    | 19.4     | 19.8 | 19.4 | 19.4 | 19.5 | 20.8          | 20.6 | 20.2 | 20.1 | 20.4 | 20.6           | 20.3 | 20.2 | 20.3 | 20.4 | 19.6           | 19.6 | 20.9 | 20.6 | 20.2 |
| A3                | control       | 40.0     | 40.0 | 36.9 | 40.0 | 39.2 | 39.3          | 37.5 | 40.0 | 37.9 | 38.7 | 38.5           | 38.2 | 39.7 | 40.0 | 39.1 | 36.8           | 36.6 | 40.0 | 40.0 | 38.4 |
| A4                | hsa-miR-154   | 27.8     | 27.6 | 28.0 | 28.7 | 28.0 | 28.8          | 28.4 | 29.1 | 28.3 | 28.6 | 28.2           | 28.2 | 29.2 | 28.9 | 28.6 | 27.1           | 27.9 | 29.8 | 29.2 | 28.5 |
| A5                | hsa-miR-154*  | 25.1     | 25.4 | 26.0 | 26.2 | 25.7 | 26.2          | 26.4 | 26.5 | 25.9 | 26.3 | 27.1           | 27.4 | 27.7 | 27.3 | 27.3 | 26.4           | 27.1 | 29.3 | 28.8 | 27.9 |
| A6                | hsa-miR-155   | 24.1     | 24.2 | 23.2 | 23.5 | 23.8 | 25.3          | 25.0 | 24.4 | 24.1 | 24.7 | 24.2           | 24.2 | 24.7 | 24.4 | 24.4 | 22.7           | 23.1 | 24.9 | 24.9 | 23.9 |
| A7                | hsa-miR-181a  | 22.5     | 22.5 | 22.6 | 23.0 | 22.7 | 22.7          | 23.1 | 23.0 | 22.4 | 22.8 | 22.6           | 22.9 | 22.6 | 22.3 | 22.6 | 21.0           | 21.1 | 22.8 | 22.1 | 21.7 |
| A8                | hsa-miR-181b  | 21.3     | 21.5 | 20.7 | 21.0 | 21.1 | 22.6          | 22.1 | 21.8 | 21.0 | 21.9 | 21.5           | 22.0 | 21.4 | 21.0 | 21.5 | 20.4           | 20.6 | 22.1 | 21.7 | 21.2 |
| A9                | hsa-miR-181c  | 26.3     | 27.1 | 27.3 | 27.8 | 27.1 | 27.7          | 28.0 | 28.1 | 27.7 | 27.9 | 27.4           | 27.7 | 27.4 | 27.4 | 27.5 | 25.4           | 26.1 | 28.1 | 27.1 | 26.7 |
| A10               | hsa-miR-182   | 32.9     | 34.1 | 34.8 | 33.8 | 33.9 | 33.7          | 35.0 | 37.6 | 36.1 | 35.6 | 33.8           | 34.7 | 36.3 | 35.7 | 35.1 | 32.1           | 33.7 | 35.3 | 34.4 | 33.9 |
| A11               | hsa-miR-182*  | 38.1     | 40.0 | 36.9 | 40.0 | 38.7 | 40.0          | 39.4 | 39.9 | 36.1 | 38.8 | 40.0           | 39.0 | 39.8 | 40.0 | 39.7 | 37.5           | 39.7 | 37.7 | 36.2 | 37.8 |
| A12               | hsa-miR-183   | 40.0     | 37.8 | 39.1 | 38.8 | 38.9 | 40.0          | 40.0 | 40.0 | 37.4 | 39.3 | 39.2           | 39.7 | 38.2 | 40.0 | 39.3 | 38.0           | 37.5 | 40.0 | 37.5 | 38.2 |
| B1                | hsa-miR-184   | 39.3     | 39.0 | 40.0 | 40.0 | 39.6 | 38.9          | 36.7 | 35.7 | 35.3 | 36.7 | 40.0           | 40.0 | 40.0 | 36.4 | 39.1 | 37.3           | 40.0 | 40.0 | 40.0 | 39.3 |
| B2                | hsa-miR-185   | 27.3     | 27.3 | 26.9 | 27.5 | 27.2 | 28.3          | 28.0 | 28.5 | 28.3 | 28.3 | 28.1           | 28.2 | 28.5 | 28.3 | 28.3 | 27.3           | 27.6 | 29.2 | 29.1 | 28.3 |
| B3                | hsa-miR-186   | 23.0     | 22.7 | 21.8 | 22.3 | 22.5 | 23.4          | 23.3 | 22.7 | 22.1 | 22.9 | 23.2           | 23.3 | 22.6 | 22.3 | 22.9 | 22.6           | 22.9 | 23.1 | 23.1 | 22.9 |
| B4                | hsa-miR-187   | 33.1     | 32.6 | 33.2 | 33.4 | 33.1 | 34.3          | 33.5 | 33.4 | 33.2 | 33.6 | 34.2           | 33.6 | 35.1 | 33.1 | 34.0 | 32.1           | 32.9 | 34.8 | 33.2 | 33.2 |
| B5                | control       | 26.1     | 26.2 | 26.7 | 26.9 | 26.5 | 27.3          | 27.4 | 28.1 | 27.8 | 27.6 | 27.0           | 27.7 | 28.7 | 28.4 | 27.9 | 27.5           | 28.0 | 29.6 | 29.5 | 28.6 |
| B6                | hsa-miR-189   | 30.2     | 30.5 | 32.8 | 33.4 | 31.7 | 32.2          | 32.0 | 34.4 | 33.2 | 32.9 | 31.9           | 31.6 | 35.2 | 33.8 | 33.1 | 31.1           | 31.4 | 34.5 | 35.9 | 33.2 |
| B7                | hsa-miR-190   | 32.5     | 33.2 | 34.0 | 35.4 | 33.8 | 33.1          | 34.2 | 34.5 | 35.9 | 34.4 | 33.2           | 34.7 | 37.1 | 35.0 | 35.0 | 32.6           | 33.6 | 34.9 | 36.1 | 34.3 |
| B8                | hsa-miR-191   | 23.4     | 23.8 | 23.9 | 24.2 | 23.8 | 24.3          | 24.5 | 24.3 | 23.9 | 24.2 | 23.3           | 24.5 | 24.6 | 23.9 | 24.1 | 22.4           | 23.4 | 25.1 | 25.0 | 24.0 |
| B9                | control       | 27.6     | 27.6 | 27.9 | 28.3 | 27.8 | 28.3          | 28.3 | 28.4 | 28.3 | 28.3 | 27.8           | 28.1 | 28.1 | 27.5 | 27.9 | 27.0           | 27.1 | 28.6 | 27.8 | 27.6 |
| B10               | hsa-miR-193   | 24.1     | 24.1 | 24.9 | 25.2 | 24.6 | 25.2          | 24.9 | 26.6 | 26.3 | 25.8 | 24.4           | 24.3 | 26.9 | 26.4 | 25.5 | 24.0           | 23.7 | 27.1 | 27.0 | 25.4 |
| B11               | hsa-miR-194   | 27.0     | 27.3 | 27.7 | 28.0 | 27.5 | 27.7          | 27.6 | 28.0 | 28.1 | 27.8 | 27.6           | 27.6 | 28.3 | 27.9 | 27.9 | 26.6           | 26.7 | 27.9 | 27.9 | 27.3 |
| B12               | hsa-miR-195   | 23.5     | 24.1 | 23.4 | 23.9 | 23.7 | 24.8          | 24.6 | 24.6 | 24.1 | 24.5 | 24.2           | 24.5 | 24.3 | 23.5 | 24.1 | 22.4           | 22.9 | 24.0 | 23.9 | 23.3 |
| C1                | hsa-miR-197   | 28.8     | 28.1 | 29.1 | 29.2 | 28.8 | 28.6          | 28.5 | 29.1 | 28.2 | 28.6 | 28.1           | 28.0 | 28.4 | 29.0 | 28.4 | 26.5           | 26.2 | 27.6 | 27.3 | 26.9 |
| C2                | hsa-miR-198   | 37.7     | 35.4 | 34.4 | 35.3 | 35.7 | 36.2          | 38.1 | 33.8 | 34.1 | 35.6 | 34.9           | 37.2 | 35.0 | 35.3 | 35.6 | 33.1           | 35.2 | 34.9 | 33.6 | 34.2 |
| C3                | hsa-miR-199a  | 26.3     | 25.2 | 26.1 | 26.2 | 26.0 | 26.7          | 26.5 | 27.6 | 26.4 | 26.8 | 26.8           | 26.8 | 27.7 | 27.4 | 27.2 | 27.3           | 26.9 | 28.8 | 28.3 | 27.8 |
| C4                | hsa-miR-199a* | 23.9     | 23.9 | 22.7 | 23.1 | 23.4 | 24.6          | 24.3 | 24.1 | 23.7 | 24.2 | 24.3           | 24.2 | 23.6 | 23.6 | 23.9 | 23.5           | 23.6 | 24.3 | 24.1 | 23.9 |
| C5                | hsa-miR-199b  | 28.1     | 28.0 | 28.7 | 29.1 | 28.5 | 29.0          | 29.0 | 29.6 | 29.1 | 29.2 | 29.4           | 29.7 | 30.2 | 29.7 | 29.8 | 29.4           | 29.2 | 31.0 | 31.4 | 30.3 |
| C6                | hsa-miR-199-s | 24.7     | 25.6 | 26.0 | 26.2 | 25.6 | 25.6          | 26.5 | 26.5 | 26.1 | 26.2 | 25.4           | 26.7 | 27.2 | 26.7 | 26.5 | 25.5           | 26.5 | 27.6 | 27.2 | 26.7 |
| C7                | hsa-miR-200a  | 32.0     | 31.8 | 32.3 | 33.1 | 32.3 | 32.6          | 32.4 | 33.3 | 32.0 | 32.6 | 32.3           | 32.1 |      | 33.2 | 32.5 | 30.6           | 30.2 | 32.6 | 32.3 | 31.4 |
| C8                | hsa-miR-200b  | 33.3     | 33.3 | 33.1 | 33.4 | 33.3 | 34.5          | 35.0 | 33.5 | 34.2 | 34.3 | 34.1           | 33.3 | 33.5 | 32.7 | 33.4 | 30.6           | 31.6 | 34.2 | 33.0 | 32.3 |
| C9                | hsa-miR-200c  | 32.7     | 32.5 | 32.6 | 32.7 | 32.6 | 33.0          | 33.5 | 31.6 | 31.9 | 32.5 | 32.8           | 33.1 | 33.4 | 32.7 | 33.0 | 32.8           | 32.3 | 33.4 | 33.2 | 32.9 |
| C10               | hsa-miR-203   | 33.5     | 33.8 | 33.7 | 34.5 | 33.9 | 34.9          | 34.5 | 34.9 | 35.3 | 34.9 | 34.0           | 34.0 | 34.6 | 34.1 | 34.2 | 32.4           | 32.1 | 34.5 | 33.5 | 33.1 |
| C11               | hsa-miR-204   | 26.1     | 28.1 | 28.3 | 28.7 | 27.8 | 29.4          | 28.6 | 27.2 | 26.8 | 28.0 | 29.0           | 29.9 | 27.9 | 27.7 | 28.6 | 28.4           | 28.6 | 28.5 | 31.4 | 29.2 |
| C12               | hsa-miR-205   | 37.1     | 40.0 | 39.4 | 40.0 | 39.1 | 40.0          | 39.4 | 39.8 | 40.0 | 39.8 | 38.3           | 40.0 | 40.0 | 40.0 | 39.6 | 40.0           | 38.1 | 38.3 | 38.1 | 38.6 |
| D1                | control       | 36.4     | 36.4 | 37.6 | 36.5 | 36.7 | 36.3          | 36.5 | 35.3 | 36.0 | 36.0 | 37.3           | 39.5 | 36.1 | 34.3 | 36.8 | 35.0           | 38.1 | 36.9 | 34.5 | 36.2 |
| D2                | control       | 40.0     | 40.0 | 40.0 | 40.0 | 40.0 | 40.0          | 40.0 | 40.0 | 38.2 | 39.6 | 38.5           | 40.0 | 39.4 | 40.0 | 39.5 | 38.2           | 40.0 | 39.0 |      | 39.1 |
| D3                | hsa-miR-210   | 25.7     | 25.6 | 26.1 | 26.4 | 25.9 | 23.6          | 23.4 | 23.4 | 22.4 | 23.2 | 21.8           | 21.8 | 21.6 | 21.6 | 21.7 | 20.5           | 20.6 | 22.0 | 21.6 | 21.2 |
| D4                | hsa-miR-211   | 35.2     | 34.8 | 34.8 | 35.6 | 35.1 | 37.7          | 35.5 | 36.5 | 35.1 | 36.2 | 35.5           | 36.8 | 35.4 | 35.9 | 35.9 | 35.4           | 36.0 | 35.9 | 34.7 | 35.5 |
| D5                | hsa-miR-213   | 26.2     | 26.2 | 26.6 | 27.0 | 26.5 | 27.4          | 27.1 | 27.2 | 26.9 | 27.2 | 27.4           | 27.4 | 27.0 | 26.8 | 27.1 | 26.3           | 26.3 | 28.0 | 27.4 | 27.0 |
| D6                | hsa-miR-214   | 25.6     | 25.4 | 24.9 | 25.5 | 25.3 | 26.1          | 26.2 | 25.7 | 25.5 | 25.9 | 26.1           | 26.1 | 25.7 | 25.7 | 25.9 | 24.9           | 25.2 | 26.1 | 26.0 | 25.6 |
| D7                | hsa-miR-215   | 29.7     | 29.7 | 30.6 | 30.8 | 30.2 | 30.7          | 30.7 | 31.3 | 30.7 | 30.9 | 29.9           | 29.8 | 30.3 | 30.5 | 30.1 | 29.9           | 30.1 | 31.1 | 31.0 | 30.5 |
| D8                | hsa-miR-216   | 23.5     | 23.6 | 25.1 | 25.4 | 24.4 | 24.9          | 24.8 | 26.3 | 26.1 | 25.5 | 24.5           | 24.6 | 25.7 | 25.6 | 25.1 | 23.7           | 23.8 | 26.6 | 26.2 | 25.1 |
| D9                | control       | 26.5     | 26.3 | 27.3 | 27.5 | 26.9 | 28.2          | 28.2 | 28.4 | 28.0 | 28.2 | 27.8           | 27.8 | 28.1 | 28.0 | 27.9 | 27.2           | 27.3 | 29.1 | 28.4 | 28.0 |
| D10               | hsa-miR-218   | 26.4     | 26.3 | 25.0 | 25.0 | 25.7 | 27.3          | 27.1 | 26.0 | 25.5 | 26.5 | 27.3           | 27.3 | 26.4 | 26.2 | 26.8 | 26.5           | 26.4 | 27.6 | 27.1 | 26.9 |
| D11               | hsa-miR-219   | 31.1     | 31.4 | 32.2 | 32.8 | 31.9 | 32.7          | 32.4 | 32.1 | 31.9 | 32.3 | 32.2           | 32.4 | 32.5 | 32.3 | 32.3 | 31.2           | 31.6 | 33.7 | 32.8 | 32.3 |
| D12               | hsa-miR-220   | 40.0     | 40.0 | 40.0 | 40.0 | 40.0 | 40.0          | 40.0 | 40.0 | 40.0 | 40.0 | 40.0           | 40.0 | 40.0 | 40.0 | 40.0 | 40.0           | 40.0 | 40.0 | 40.0 | 40.0 |
| E1                | hsa-miR-221   | 20.7     | 20.1 | 19.5 | 19.5 | 19.9 | 21.2          | 21.3 | 20.5 | 19.7 | 20.7 | 21.2           | 21.5 | 20.5 | 20.3 | 20.9 | 20.8           | 21.1 | 21.3 | 21.3 | 21.1 |
| E2                | hsa-miR-222   | 20.8     | 20.4 | 20.4 | 20.4 | 20.5 | 21.8          | 21.6 | 21.0 | 20.3 | 21.2 | 21.3           | 21.1 | 20.7 | 20.6 | 20.9 | 20.1           | 20.4 | 21.1 | 21.0 | 20.7 |
| E3                | hsa-miR-223   | 35.1     | 34.4 | 35.3 | 36.5 | 35.3 | 35.8          | 36.6 | 35.0 | 33.9 | 35.3 | 34.7           | 34.5 | 34.2 | 34.2 | 34.4 | 34.9           | 35.6 | 37.9 | 36.4 | 36.2 |
| E4                | hsa-miR-224   | 25.3     | 25.3 | 24.7 | 25.1 | 25.1 | 26.4          | 26.3 | 25.7 | 25.2 | 25.9 | 25.9           | 25.9 | 25.6 | 25.4 | 25.7 | 25.2           | 25.3 | 26.6 | 26.5 | 25.9 |
| E5                | hsa-miR-296   | 30.1     | 30.6 | 32.5 | 32.2 | 31.3 | 30.9          | 31.1 | 31.8 | 31.0 | 31.2 | 31.1           | 31.0 | 31.5 | 31.2 | 31.2 | 29.4           | 30.1 | 32.1 | 31.4 | 30.7 |
| E6                | hsa-miR-299   | 27.1     | 27.3 | 27.5 | 28.1 | 27.5 | 27.6          | 28.0 | 29.2 | 27.7 | 28.1 | 27.5           | 27.0 | 28.2 | 28.1 | 27.7 | 26.5           | 26.6 | 28.4 | 28.8 | 27.6 |
| E7                | hsa-miR-301   | 24.0     | 23.9 | 23.7 |      | 23.9 | 24.9          | 24.9 | 24.5 | 24.7 | 24.7 | 24.5           | 24.5 |      | 24.3 | 24.4 | 23.4           | 23.9 | 25.1 |      | 24.1 |
| E8                | hsa-miR-302a  | 36.5     | 40.0 | 36.2 | 40.0 | 38.2 | 40.0          | 40.0 | 40.0 | 34.9 | 38.7 | 40.0           | 40.0 | 40.0 | 40.0 | 40.0 | 40.0           | 40.0 | 40.0 | 39.3 | 39.8 |
| E9                | hsa-miR-302b  | 40.0     | 40.0 | 40.0 | 40.0 | 40.0 | 40.0          | 40.0 | 40.0 | 39.3 | 39.8 | 40.0           | 40.0 | 40.0 | 40.0 | 40.0 | 40.0           | 40.0 | 40.0 | 40.0 | 40.0 |
| E10               | hsa-miR-302b* | 39.8     | 40.0 | 40.0 | 40.0 | 39.9 | 40.0          | 40.0 | 37.1 | 34.9 | 38.0 | 40.0           | 40.0 | 39.6 | 34.2 | 38.4 | 40.0           | 40.0 | 34.3 | 36.2 | 37.6 |

| PLATE 2: Δ Ct<br>(Ct of each miR -<br>median Ct) |               | normoxia |      |      |      |      | hypoxia 8 hrs |      |      |      |      | hypoxia 24 hrs |      |      |      |      | hypoxia 48 hrs |      |      |      |      |
|--------------------------------------------------|---------------|----------|------|------|------|------|---------------|------|------|------|------|----------------|------|------|------|------|----------------|------|------|------|------|
| WELL                                             | DETECTOR      | A        | B    | C    | D    | ave  | A             | B    | C    | D    | ave  | A              | B    | C    | D    | ave  | A              | B    | C    | D    | ave  |
| A1                                               | hsa-let-7a    | -6.1     | -6.0 | -8.7 | -9.1 | -7.5 | -7.5          | -7.3 | -7.4 | -7.3 | -7.4 | -7.5           | -7.1 | -7.1 | -7.6 | -7.3 | -7.3           | -7.6 | -7.0 | -7.3 | -7.3 |
| A2                                               | hsa-miR-16    | -8.1     | -7.9 | -8.4 | -8.8 | -8.3 | -7.8          | -7.8 | -8.2 | -8.1 | -8.0 | -7.5           | -7.8 | -8.2 | -7.9 | -7.9 | -7.7           | -8.2 | -8.2 | -8.3 | -8.1 |
| A3                                               | control       | 12.6     | 12.3 | 9.2  | 11.8 | 11.5 | 10.6          | 9.1  | 11.6 | 9.7  | 10.3 | 10.4           | 10.1 | 11.4 | 11.8 | 10.9 | 9.5            | 8.8  | 10.9 | 11.1 | 10.1 |
| A4                                               | hsa-miR-154   | 0.3      | 0.0  | 0.2  | 0.4  | 0.2  | 0.1           | 0.0  | 0.7  | 0.1  | 0.2  | 0.1            | 0.1  | 0.8  | 0.6  | 0.4  | -0.3           | 0.1  | 0.6  | 0.3  | 0.2  |
| A5                                               | hsa-miR-154*  | -2.3     | -2.3 | -1.7 | -2.1 | -2.1 | -2.5          | -2.0 | -1.9 | -2.2 | -2.2 | -1.1           | -0.8 | -0.7 | -1.0 | -0.9 | -0.9           | -0.7 | 0.2  | -0.2 | -0.4 |
| A6                                               | hsa-miR-155   | -3.3     | -3.4 | -4.6 | -4.8 | -4.0 | -3.3          | -3.5 | -4.0 | -4.1 | -3.7 | -3.9           | -4.0 | -3.7 | -3.8 | -3.9 | -4.6           | -4.7 | -4.2 | -4.0 | -4.4 |
| A7                                               | hsa-miR-181a  | -4.9     | -5.1 | -5.2 | -5.2 | -5.1 | -5.9          | -5.4 | -5.4 | -5.7 | -5.6 | -5.5           | -5.3 | -5.8 | -5.9 | -5.6 | -6.4           | -6.7 | -6.3 | -6.8 | -6.5 |
| A8                                               | hsa-miR-181b  | -6.1     | -6.2 | -7.1 | -7.2 | -6.6 | -6.1          | -6.4 | -6.6 | -7.1 | -6.5 | -6.7           | -6.1 | -7.0 | -7.3 | -6.8 | -7.0           | -7.2 | -7.1 | -7.2 | -7.1 |
| A9                                               | hsa-miR-181c  | -1.1     | -0.6 | -0.4 | -0.4 | -0.6 | -0.9          | -0.5 | -0.3 | -0.4 | -0.5 | -0.7           | -0.4 | -1.0 | -0.9 | -0.7 | -1.9           | -1.7 | -1.0 | -1.8 | -1.6 |
| A10                                              | hsa-miR-182   | 5.4      | 6.4  | 7.0  | 5.6  | 6.1  | 5.1           | 6.6  | 9.2  | 7.9  | 7.2  | 5.7            | 6.5  | 7.9  | 7.5  | 6.9  | 4.8            | 5.9  | 6.1  | 5.5  | 5.6  |
| A11                                              | hsa-miR-182*  | 10.6     | 12.3 | 9.1  | 11.8 | 11.0 | 11.4          | 10.9 | 11.5 | 8.0  | 10.4 | 11.9           | 10.8 | 11.4 | 11.8 | 11.5 | 10.2           | 11.9 | 8.6  | 7.3  | 9.5  |
| A12                                              | hsa-miR-183   | 12.6     | 10.1 | 11.3 | 10.5 | 11.1 | 11.4          | 11.5 | 11.6 | 9.3  | 10.9 | 11.0           | 11.5 | 9.8  | 11.8 | 11.0 | 10.7           | 9.7  | 10.9 | 8.5  | 9.9  |
| B1                                               | hsa-miR-184   | 11.8     | 11.4 | 12.2 | 11.8 | 11.8 | 10.3          | 8.3  | 7.3  | 7.2  | 8.2  | 11.9           | 11.9 | 11.6 | 8.2  | 10.9 | 9.9            | 12.2 | 10.9 | 11.1 | 11.0 |
| B2                                               | hsa-miR-185   | -0.1     | -0.4 | -0.9 | -0.8 | -0.6 | -0.3          | -0.4 | 0.1  | 0.2  | -0.1 | -0.1           | 0.0  | 0.2  | 0.1  | 0.1  | 0.0            | -0.2 | 0.0  | 0.2  | 0.0  |
| B3                                               | hsa-miR-186   | -4.5     | -4.9 | -5.9 | -6.0 | -5.3 | -5.2          | -5.2 | -5.7 | -6.0 | -5.5 | -4.9           | -4.8 | -5.8 | -5.9 | -5.4 | -4.8           | -4.9 | -6.0 | -5.8 | -5.4 |
| B4                                               | hsa-miR-187   | 5.7      | 4.9  | 5.4  | 5.1  | 5.3  | 5.7           | 5.1  | 5.0  | 5.1  | 5.2  | 6.1            | 5.4  | 6.7  | 4.9  | 5.8  | 4.8            | 5.2  | 5.6  | 4.2  | 5.0  |
| B5                                               | control       | -1.4     | -1.4 | -1.1 | -1.4 | -1.3 | -1.3          | -1.1 | -0.3 | -0.4 | -0.8 | -1.1           | -0.5 | 0.3  | 0.2  | -0.3 | 0.2            | 0.3  | 0.4  | 0.5  | 0.3  |
| B6                                               | hsa-miR-189   | 2.8      | 2.8  | 5.1  | 5.2  | 3.9  | 3.5           | 3.5  | 6.0  | 5.1  | 4.5  | 3.8            | 3.5  | 6.8  | 5.6  | 4.9  | 3.7            | 3.6  | 5.4  | 7.0  | 4.9  |
| B7                                               | hsa-miR-190   | 5.1      | 5.6  | 6.2  | 7.2  | 6.0  | 4.5           | 5.7  | 6.1  | 7.8  | 6.0  | 5.1            | 6.6  | 8.7  | 6.8  | 6.8  | 5.3            | 5.8  | 5.7  | 7.2  | 6.0  |
| B8                                               | hsa-miR-191   | -4.0     | -3.9 | -3.9 | -4.1 | -4.0 | -4.3          | -4.0 | -4.1 | -4.3 | -4.2 | -4.8           | -3.7 | -3.8 | -4.4 | -4.2 | -4.9           | -4.4 | -4.1 | -3.9 | -4.3 |
| B9                                               | control       | 0.1      | -0.1 | 0.1  | 0.0  | 0.0  | -0.4          | -0.2 | 0.0  | 0.2  | -0.1 | -0.3           | 0.0  | -0.3 | -0.7 | -0.4 | -0.4           | -0.7 | -0.5 | -1.1 | -0.7 |
| B10                                              | hsa-miR-193   | -3.3     | -3.5 | -2.8 | -3.1 | -3.2 | -3.5          | -3.6 | -1.8 | -1.8 | -2.6 | -3.7           | -3.8 | -1.5 | -1.8 | -2.7 | -3.4           | -4.0 | -2.1 | -1.9 | -2.9 |
| B11                                              | hsa-miR-194   | -0.4     | -0.4 | -0.1 | -0.3 | -0.3 | -1.0          | -0.9 | -0.4 | 0.0  | -0.6 | -0.5           | -0.6 | 0.0  | -0.3 | -0.4 | -0.8           | -1.1 | -1.2 | -1.0 | -1.0 |
| B12                                              | hsa-miR-195   | -3.9     | -3.6 | -4.4 | -4.4 | -4.1 | -3.8          | -3.9 | -3.8 | -4.1 | -3.9 | -3.9           | -3.7 | -4.1 | -4.7 | -4.1 | -4.9           | -4.8 | -5.1 | -5.0 | -5.0 |
| C1                                               | hsa-miR-197   | 1.3      | 0.4  | 1.3  | 0.9  | 1.0  | 0.0           | 0.0  | 0.7  | 0.1  | 0.2  | -0.1           | -0.2 | 0.0  | 0.8  | 0.1  | -0.9           | -1.6 | -1.6 | -1.7 | -1.4 |
| C2                                               | hsa-miR-198   | 10.3     | 7.7  | 6.7  | 7.0  | 7.9  | 7.6           | 9.7  | 5.4  | 6.0  | 7.1  | 6.8            | 9.1  | 6.6  | 7.1  | 7.4  | 5.8            | 7.4  | 5.8  | 4.6  | 5.9  |
| C3                                               | hsa-miR-199a  | -1.1     | -2.5 | -1.7 | -2.1 | -1.8 | -1.9          | -2.0 | -0.8 | -1.7 | -1.6 | -1.3           | -1.4 | -0.7 | -0.8 | -1.1 | -0.1           | -0.9 | -0.4 | -0.6 | -0.5 |
| C4                                               | hsa-miR-199a* | -3.5     | -3.7 | -5.0 | -5.2 | -4.4 | -4.0          | -4.1 | -4.3 | -4.5 | -4.2 | -3.8           | -4.0 | -4.7 | -4.7 | -4.3 | -3.9           | -4.2 | -4.8 | -4.9 | -4.4 |
| C5                                               | hsa-miR-199b  | 0.7      | 0.4  | 0.9  | 0.8  | 0.7  | 0.4           | 0.5  | 1.2  | 1.0  | 0.8  | 1.3            | 1.6  | 1.8  | 1.5  | 1.5  | 2.1            | 1.4  | 1.9  | 2.5  | 2.0  |
| C6                                               | hsa-miR-199-s | -2.8     | -2.1 | -1.8 | -2.1 | -2.2 | -3.1          | -2.0 | -1.9 | -2.0 | -2.2 | -2.7           | -1.5 | -1.2 | -1.5 | -1.7 | -1.8           | -1.3 | -1.6 | -1.7 | -1.6 |
| C7                                               | hsa-miR-200a  | 4.5      | 4.1  | 4.6  | 4.9  | 4.5  | 3.9           | 3.9  | 4.9  | 3.9  | 4.2  | 4.1            | 3.9  |      | 5.0  | 4.4  | 3.3            | 2.4  | 3.5  | 3.3  | 3.1  |
| C8                                               | hsa-miR-200b  | 5.9      | 5.6  | 5.3  | 5.2  | 5.5  | 5.9           | 6.5  | 5.1  | 6.1  | 5.9  | 5.9            | 5.1  | 5.1  | 4.5  | 5.2  | 3.2            | 3.8  | 5.1  | 4.1  | 4.1  |
| C9                                               | hsa-miR-200c  | 5.3      | 4.8  | 4.8  | 4.4  | 4.8  | 4.4           | 5.0  | 3.2  | 3.8  | 4.1  | 4.7            | 5.0  | 5.0  | 4.5  | 4.8  | 5.5            | 4.5  | 4.2  | 4.3  | 4.6  |
| C10                                              | hsa-miR-203   | 6.0      | 6.1  | 6.0  | 6.2  | 6.1  | 6.3           | 6.0  | 6.5  | 7.1  | 6.5  | 5.9            | 5.8  | 6.2  | 5.9  | 6.0  | 5.0            | 4.3  | 5.4  | 4.6  | 4.8  |
| C11                                              | hsa-miR-204   | -1.4     | 0.5  | 0.5  | 0.4  | 0.0  | 0.7           | 0.2  | -1.3 | -1.4 | -0.4 | 0.9            | 1.7  | -0.5 | -0.5 | 0.4  | 1.1            | 0.8  | -0.6 | 2.4  | 0.9  |
| C12                                              | hsa-miR-205   | 9.7      | 12.3 | 11.7 | 11.8 | 11.4 | 11.4          | 10.9 | 11.4 | 11.9 | 11.4 | 10.2           | 11.9 | 11.6 | 11.8 | 11.4 | 12.7           | 10.3 | 9.1  | 9.2  | 10.3 |
| D1                                               | control       | 8.9      | 8.8  | 9.9  | 8.3  | 8.9  | 7.7           | 8.0  | 6.9  | 7.9  | 7.6  | 9.1            | 11.4 | 7.7  | 6.1  | 8.6  | 7.7            | 10.4 | 7.8  | 5.6  | 7.9  |
| D2                                               | control       | 12.6     | 12.3 | 12.2 | 11.8 | 12.2 | 11.4          | 11.5 | 11.6 | 10.1 | 11.1 | 10.3           | 11.9 | 11.0 | 11.8 | 11.2 | 10.9           | 12.2 | 9.8  |      | 11.0 |
| D3                                               | hsa-miR-210   | -1.8     | -2.1 | -1.7 | -1.9 | -1.9 | -5.0          | -5.1 | -5.0 | -5.7 | -5.2 | -6.4           | -6.3 | -6.8 | -6.6 | -6.5 | -6.8           | -7.2 | -7.1 | -7.3 | -7.1 |
| D4                                               | hsa-miR-211   | 7.7      | 7.2  | 7.0  | 7.3  | 7.3  | 9.0           | 7.0  | 8.1  | 7.0  | 7.8  | 7.3            | 8.6  | 7.0  | 7.7  | 7.7  | 8.1            | 8.2  | 6.8  | 5.8  | 7.2  |
| D5                                               | hsa-miR-213   | -1.3     | -1.4 | -1.2 | -1.3 | -1.3 | -1.2          | -1.4 | -1.2 | -1.2 | -1.2 | -0.7           | -0.8 | -1.4 | -1.4 | -1.1 | -1.1           | -1.5 | -1.2 | -1.5 | -1.3 |
| D6                                               | hsa-miR-214   | -1.9     | -2.3 | -2.9 | -2.8 | -2.4 | -2.5          | -2.2 | -2.7 | -2.6 | -2.5 | -2.1           | -2.0 | -2.7 | -2.5 | -2.3 | -2.5           | -2.6 | -3.0 | -2.9 | -2.7 |
| D7                                               | hsa-miR-215   | 2.2      | 2.0  | 2.8  | 2.6  | 2.4  | 2.1           | 2.2  | 2.9  | 2.6  | 2.5  | 1.7            | 1.7  | 1.9  | 2.2  | 1.9  | 2.6            | 2.3  | 1.9  | 2.1  | 2.2  |
| D8                                               | hsa-miR-216   | -3.9     | -4.1 | -2.6 | -2.8 | -3.4 | -3.8          | -3.7 | -2.1 | -2.1 | -2.9 | -3.7           | -3.5 | -2.7 | -2.7 | -3.1 | -3.7           | -4.0 | -2.6 | -2.7 | -3.2 |
| D9                                               | control       | -1.0     | -1.4 | -0.5 | -0.7 | -0.9 | -0.4          | -0.2 | 0.0  | -0.1 | -0.2 | -0.3           | -0.4 | -0.3 | -0.2 | -0.3 | -0.1           | -0.5 | 0.0  | -0.5 | -0.3 |
| D10                                              | hsa-miR-218   | -1.0     | -1.4 | -2.8 | -3.2 | -2.1 | -1.3          | -1.3 | -2.4 | -2.6 | -1.9 | -0.8           | -0.8 | -2.0 | -2.1 | -1.4 | -0.8           | -1.4 | -1.6 | -1.8 | -1.4 |
| D11                                              | hsa-miR-219   | 3.7      | 3.7  | 4.4  | 4.5  | 4.1  | 4.1           | 3.9  | 3.7  | 3.8  | 3.9  | 4.0            | 4.3  | 4.1  | 4.1  | 4.1  | 3.9            | 3.8  | 4.6  | 3.8  | 4.0  |
| D12                                              | hsa-miR-220   | 12.6     | 12.3 | 12.2 | 11.8 | 12.2 | 11.4          | 11.5 | 11.6 | 11.9 | 11.6 | 11.9           | 11.9 | 11.6 | 11.8 | 11.8 | 12.7           | 12.2 | 10.9 | 11.1 | 11.7 |
| E1                                               | hsa-miR-221   | -6.8     | -7.6 | -8.3 | -8.7 | -7.8 | -7.4          | -7.2 | -7.9 | -8.4 | -7.7 | -7.0           | -6.7 | -7.9 | -8.0 | -7.4 | -6.6           | -6.6 | -7.9 | -7.6 | -7.2 |
| E2                                               | hsa-miR-222   | -6.7     | -7.3 | -7.4 | -7.9 | -7.3 | -6.8          | -6.9 | -7.4 | -7.8 | -7.2 | -6.9           | -7.0 | -7.7 | -7.6 | -7.3 | -7.2           | -7.4 | -8.1 | -7.9 | -7.6 |
| E3                                               | hsa-miR-223   | 7.7      | 6.7  | 7.5  | 8.2  | 7.5  | 7.2           | 8.1  | 6.6  | 5.8  | 6.9  | 6.6            | 6.3  | 5.8  | 6.0  | 6.2  | 7.5            | 7.8  | 8.8  | 7.4  | 7.9  |
| E4                                               | hsa-miR-224   | -2.2     | -2.4 | -3.1 | -3.2 | -2.7 | -2.2          | -2.2 | -2.7 | -3.0 | -2.5 | -2.2           | -2.3 | -2.8 | -2.8 | -2.5 | -2.1           | -2.5 | -2.6 | -2.5 | -2.4 |
| E5                                               | hsa-miR-296   | 2.7      | 3.0  | 4.7  | 3.9  | 3.6  | 2.3           | 2.6  | 3.4  | 2.9  | 2.8  | 2.9            | 2.9  | 3.1  | 3.0  | 3.0  | 2.0            | 2.3  | 2.9  | 2.5  | 2.4  |
| E6                                               | hsa-miR-299   | -0.3     | -0.4 | -0.2 | -0.2 | -0.3 | -1.0          | -0.4 | 0.8  | -0.5 | -0.3 | -0.6           | -1.2 | -0.1 | -0.1 | -0.5 | -0.8           | -1.2 | -0.8 | -0.2 | -0.7 |
| E7                                               | hsa-miR-301   | -3.5     | -3.7 | -4.1 |      | -3.8 | -3.8          | -3.6 | -3.9 | -3.4 | -3.7 | -3.7           | -3.6 |      | -3.9 | -3.7 | -3.9           | -3.9 | -4.0 |      | -4.0 |
| E8                                               | hsa-miR-302a  | 9.0      | 12.3 | 8.4  | 11.8 | 10.4 | 11.4          | 11.5 | 11.6 | 6.8  | 10.3 | 11.9           | 11.9 | 11.6 | 11.8 | 11.8 | 12.7           | 12.2 | 10.9 | 10.4 | 11.5 |
| E9                                               | hsa-miR-302b  | 12.6     | 12.3 | 12.2 | 11.8 | 12.2 | 11.4          | 11.5 | 11.6 | 11.1 | 11.4 | 11.9           | 11.9 | 11.6 | 11.8 | 11.8 | 12.7           | 12.2 | 10.9 | 11.1 | 11.7 |
| E10                                              | hsa-miR-302b* | 12.3     | 12.3 | 12.2 | 11.8 | 12.2 | 11.4          | 11.5 | 8.7  | 6.8  | 9.6  | 11.9           | 11.9 | 11.2 | 6.0  | 10.2 | 12.7           | 12.2 | 5.2  | 7.3  | 9.3  |
| E11                                              | hsa-miR-302c  | 12.6     | 12.3 | 12.2 | 11.8 | 12.2 | 11.4          | 11.5 | 11.6 | 11.9 | 11.6 | 11.9           | 11.9 | 11.6 | 11.8 | 11.8 | 12.7           | 12.2 | 10.9 | 11.0 | 11.7 |
| E12                                              | hsa-miR-302c* | 12.6     | 12.3 | 12.2 | 11.8 | 12.2 | 11.4          | 11.5 | 11.6 | 11.9 | 11.6 | 11.9           | 11.9 | 11.6 | 11.8 | 11.8 | 12.7           | 12.2 | 10.9 | 11.1 | 11.7 |
| F1                                               | hsa-miR-302d  | 12.6     | 12.3 | 12.2 | 11.8 | 12.2 | 11.4          | 11.5 | 7.0  | 10.1 | 10.0 | 11.9           | 11.9 | 11.6 | 9.9  | 11.3 | 12.7           | 12.2 | 8.5  | 8.0  | 10.4 |
| F2                                               | hsa-miR-320   | -2.4     | -3.2 | -5.0 | -5.2 | -3.9 | -3.3          | -3.3 | -4.7 | -4.9 | -4.0 | -3.3           | -3.1 | -4.4 | -4.1 | -3.7 | -3.6           | -3.7 | -5.0 | -5.1 | -4.3 |
| F3                                               | control       | -7.3     | -7.5 | -7.2 | -7.3 | -7.3 | -6.5          | -6.6 | -7.9 | -7.8 | -7.2 | -5.0           | -5.3 | -6.5 | -6.4 | -5.8 | -4.7           | -5.0 | -5.1 | -4.8 | -4.9 |
| F4                                               | hsa-miR-323   | -0.2     | 0.0  | -0.3 | -0.4 | -0.2 | 0.0           | 0.0  | -1.3 | -1.3 | -0.7 | 0.1            | 0.2  | -0.6 | -0.6 | -0.2 |                |      |      |      |      |

| PLATE 2: ΔΔ Ct<br>(Δ Ct sample -<br>media Δ Ct<br>normoxia) |                | normoxia |      |        |      |     | hypoxia 8 hrs |      |      |      |      | hypoxia 24 hrs |      |      |      |      | hypoxia 48 hrs |      |      |      |      |
|-------------------------------------------------------------|----------------|----------|------|--------|------|-----|---------------|------|------|------|------|----------------|------|------|------|------|----------------|------|------|------|------|
| WELL                                                        | DETECTOR       | A        | B    | C      | D    | ave | A             | B    | C    | D    | ave  | A              | B    | C    | D    | ave  | A              | B    | C    | D    | ave  |
| A1                                                          | hsa-let-7a     | 1,3      | 1,5  | -1,2   | -1,6 | 0,0 | 0,0           | 0,2  | 0,1  | 0,1  | 0,1  | 0,0            | 0,4  | 0,4  | -0,2 | 0,1  | 0,2            | -0,1 | 0,4  | 0,2  | 0,2  |
| A2                                                          | hsa-miR-16     | 0,2      | 0,4  | -0,1   | -0,6 | 0,0 | 0,5           | 0,5  | 0,1  | 0,2  | 0,3  | 0,8            | 0,4  | 0,1  | 0,4  | 0,4  | 0,6            | 0,1  | 0,1  | 0,0  | 0,2  |
| A3                                                          | control        | 1,1      | 0,9  | -2,3   | 0,3  | 0,0 | -0,8          | -2,4 | 0,1  | -1,7 | -1,2 | -1,0           | -1,4 | -0,1 | 0,3  | -0,5 | -2,0           | -2,6 | -0,6 | -0,4 | -1,4 |
| A4                                                          | hsa-miR-154    | 0,1      | -0,3 | 0,0    | 0,2  | 0,0 | -0,1          | -0,3 | 0,5  | -0,1 | 0,0  | -0,2           | -0,2 | 0,5  | 0,4  | 0,1  | -0,5           | -0,1 | 0,4  | 0,1  | 0,0  |
| A5                                                          | hsa-miR-154*   | -0,2     | -0,2 | 0,4    | 0,0  | 0,0 | -0,4          | 0,1  | 0,2  | -0,1 | 0,0  | 1,1            | 1,3  | 1,4  | 1,1  | 1,2  | 1,2            | 1,4  | 2,3  | 2,0  | 1,7  |
| A6                                                          | hsa-miR-155    | 0,7      | 0,6  | -0,5   | -0,8 | 0,0 | 0,7           | 0,6  | 0,1  | -0,1 | 0,3  | 0,1            | 0,1  | 0,3  | 0,2  | 0,2  | -0,6           | -0,7 | -0,2 | 0,0  | -0,4 |
| A7                                                          | hsa-miR-181a   | 0,2      | 0,0  | -0,1   | -0,1 | 0,0 | -0,8          | -0,3 | -0,3 | -0,6 | -0,5 | -0,4           | -0,2 | -0,7 | -0,8 | -0,5 | -1,3           | -1,6 | -1,2 | -1,7 | -1,4 |
| A8                                                          | hsa-miR-181b   | 0,5      | 0,5  | -0,4   | -0,6 | 0,0 | 0,6           | 0,3  | 0,1  | -0,5 | 0,1  | 0,0            | 0,5  | -0,4 | -0,6 | -0,1 | -0,3           | -0,5 | -0,4 | -0,6 | -0,5 |
| A9                                                          | hsa-miR-181c   | -0,5     | 0,1  | 0,2    | 0,2  | 0,0 | -0,3          | 0,2  | 0,3  | 0,2  | 0,1  | 0,0            | 0,2  | -0,3 | -0,2 | -0,1 | -1,3           | -1,0 | -0,4 | -1,2 | -1,0 |
| A10                                                         | hsa-miR-182    | -0,7     | 0,3  | 0,9    | -0,5 | 0,0 | -1,0          | 0,5  | 3,1  | 1,8  | 1,1  | -0,4           | 0,4  | 1,8  | 1,4  | 0,8  | -1,3           | -0,2 | 0,0  | -0,6 | -0,5 |
| A11                                                         | hsa-miR-182*   | -0,4     | 1,4  | -1,8   | 0,8  | 0,0 | 0,4           | -0,1 | 0,5  | -3,0 | -0,5 | 0,9            | -0,1 | 0,4  | 0,8  | 0,5  | -0,7           | 1,0  | -2,4 | -3,7 | -1,5 |
| A12                                                         | hsa-miR-183    | 1,4      | -1,0 | 0,2    | -0,6 | 0,0 | 0,2           | 0,4  | 0,5  | -1,9 | -0,2 | -0,1           | 0,4  | -1,3 | 0,6  | -0,1 | -0,4           | -1,4 | -0,3 | -2,6 | -1,2 |
| B1                                                          | hsa-miR-184    | 0,0      | -0,4 | 0,4    | -0,1 | 0,0 | -1,5          | -3,5 | -4,6 | -4,6 | -3,6 | 0,1            | 0,1  | -0,2 | -3,6 | -0,9 | -1,9           | 0,4  | -0,9 | -0,7 | -0,8 |
| B2                                                          | hsa-miR-185    | 0,4      | 0,2  | -0,4   | -0,2 | 0,0 | 0,2           | 0,1  | 0,6  | 0,7  | 0,4  | 0,5            | 0,6  | 0,7  | 0,7  | 0,6  | 0,5            | 0,4  | 0,6  | 0,7  | 0,5  |
| B3                                                          | hsa-miR-186    | 0,9      | 0,4  | -0,6   | -0,6 | 0,0 | 0,1           | 0,2  | -0,4 | -0,7 | -0,2 | 0,4            | 0,5  | -0,4 | -0,6 | 0,0  | 0,6            | 0,4  | -0,7 | -0,5 | -0,1 |
| B4                                                          | hsa-miR-187    | 0,4      | -0,4 | 0,1    | -0,2 | 0,0 | 0,4           | -0,2 | -0,3 | -0,2 | -0,1 | 0,8            | 0,1  | 1,4  | -0,4 | 0,5  | -0,5           | -0,1 | 0,3  | -1,1 | -0,3 |
| B5                                                          | control        | 0,0      | -0,1 | 0,2    | -0,1 | 0,0 | 0,0           | 0,2  | 1,0  | 1,0  | 0,6  | 0,2            | 0,8  | 1,6  | 1,5  | 1,0  | 1,5            | 1,6  | 1,8  | 1,8  | 1,7  |
| B6                                                          | hsa-miR-189    | -1,2     | -1,2 | 1,1    | 1,2  | 0,0 | -0,4          | -0,5 | 2,0  | 1,1  | 0,6  | -0,2           | -0,5 | 2,8  | 1,7  | 1,0  | -0,2           | -0,4 | 1,4  | 3,1  | 1,0  |
| B7                                                          | hsa-miR-190    | -0,9     | -0,4 | 0,2    | 1,2  | 0,0 | -1,5          | -0,3 | 0,1  | 1,8  | 0,0  | -0,9           | 0,6  | 2,7  | 0,8  | 0,8  | -0,7           | -0,2 | -0,3 | 1,2  | 0,0  |
| B8                                                          | hsa-miR-191    | -0,1     | 0,1  | 0,1    | -0,1 | 0,0 | -0,4          | 0,0  | -0,2 | -0,3 | -0,2 | -0,9           | 0,3  | 0,2  | -0,4 | -0,2 | -1,0           | -0,5 | -0,1 | 0,0  | -0,4 |
| B9                                                          | control        | 0,1      | -0,1 | 0,1    | 0,0  | 0,0 | -0,4          | -0,2 | -0,1 | 0,2  | -0,1 | -0,4           | -0,1 | -0,3 | -0,8 | -0,4 | -0,4           | -0,7 | -0,5 | -1,2 | -0,7 |
| B10                                                         | hsa-miR-193    | -0,1     | -0,3 | 0,4    | 0,1  | 0,0 | -0,2          | -0,4 | 1,4  | 1,4  | 0,6  | -0,5           | -0,6 | 1,7  | 1,4  | 0,5  | -0,2           | -0,8 | 1,1  | 1,3  | 0,3  |
| B11                                                         | hsa-miR-194    | -0,1     | -0,1 | 0,2    | 0,0  | 0,0 | -0,7          | -0,6 | -0,1 | 0,2  | -0,3 | -0,2           | -0,3 | 0,2  | -0,1 | -0,1 | -0,5           | -0,8 | -0,9 | -0,7 | -0,7 |
| B12                                                         | hsa-miR-195    | 0,1      | 0,5  | -0,3   | -0,3 | 0,0 | 0,2           | 0,2  | 0,3  | 0,0  | 0,2  | 0,2            | 0,4  | 0,0  | -0,6 | 0,0  | -0,8           | -0,8 | -1,1 | -0,9 | -0,9 |
| C1                                                          | hsa-miR-197    | 0,3      | -0,6 | 0,3    | -0,1 | 0,0 | -1,0          | -1,0 | -0,3 | -0,9 | -0,8 | -1,1           | -1,2 | -1,0 | -0,2 | -0,9 | -1,9           | -2,6 | -2,6 | -2,7 | -2,4 |
| C2                                                          | hsa-miR-198    | 2,4      | -0,2 | -1,2   | -0,9 | 0,0 | -0,4          | 1,8  | -2,5 | -1,9 | -0,8 | -1,1           | 1,2  | -1,3 | -0,9 | -0,5 | -2,1           | -0,5 | -2,1 | -3,3 | -2,0 |
| C3                                                          | hsa-miR-199a   | 0,7      | -0,6 | 0,1    | -0,2 | 0,0 | -0,1          | -0,1 | 1,0  | 0,1  | 0,2  | 0,5            | 0,5  | 1,1  | 1,0  | 0,8  | 1,8            | 0,9  | 1,5  | 1,2  | 1,3  |
| C4                                                          | hsa-miR-199a*  | 0,8      | 0,6  | -0,7   | -0,8 | 0,0 | 0,3           | 0,2  | 0,0  | -0,1 | 0,1  | 0,5            | 0,4  | -0,4 | -0,3 | 0,1  | 0,5            | 0,2  | -0,5 | -0,5 | -0,1 |
| C5                                                          | hsa-miR-199b   | 0,0      | -0,3 | 0,2    | 0,1  | 0,0 | -0,3          | -0,2 | 0,5  | 0,3  | 0,1  | 0,6            | 0,9  | 1,1  | 0,8  | 0,8  | 1,4            | 0,7  | 1,2  | 1,8  | 1,3  |
| C6                                                          | hsa-miR-199-s  | -0,6     | 0,1  | 0,4    | 0,1  | 0,0 | -0,9          | 0,2  | 0,3  | 0,2  | 0,0  | -0,5           | 0,7  | 1,0  | 0,7  | 0,5  | 0,4            | 0,9  | 0,6  | 0,5  | 0,6  |
| C7                                                          | hsa-miR-200a   | 0,0      | -0,4 | 0,0    | 0,4  | 0,0 | -0,6          | -0,6 | 0,4  | -0,6 | -0,3 | -0,4           | -0,6 | 0,5  | 0,5  | -0,2 | -1,2           | -2,1 | -1,0 | -1,2 | -1,4 |
| C8                                                          | hsa-miR-200b   | 0,4      | 0,1  | -0,2   | -0,3 | 0,0 | 0,3           | 1,0  | -0,4 | 0,5  | 0,4  | 0,4            | -0,4 | -0,4 | -1,0 | -0,3 | -2,3           | -1,7 | -0,5 | -1,4 | -1,5 |
| C9                                                          | hsa-miR-200c   | 0,4      | 0,0  | 0,0    | -0,4 | 0,0 | -0,4          | 0,2  | -1,7 | -1,1 | -0,8 | -0,2           | 0,1  | 0,2  | -0,4 | -0,1 | 0,7            | -0,3 | -0,6 | -0,6 | -0,2 |
| C10                                                         | hsa-miR-203    | -0,1     | 0,0  | -0,1   | 0,2  | 0,0 | 0,2           | 0,0  | 0,4  | 1,0  | 0,4  | -0,2           | -0,2 | 0,1  | -0,2 | -0,1 | -1,1           | -1,7 | -0,7 | -1,5 | -1,2 |
| C11                                                         | hsa-miR-204    | -1,4     | 0,5  | 0,5    | 0,4  | 0,0 | 0,7           | 0,1  | -1,3 | -1,4 | -0,4 | 0,9            | 1,7  | -0,6 | -0,5 | 0,4  | 1,1            | 0,8  | -0,6 | 2,4  | 0,9  |
| C12                                                         | hsa-miR-205    | -1,7     | 1,0  | 0,3    | 0,4  | 0,0 | 0,0           | -0,4 | 0,0  | 0,5  | 0,0  | -1,2           | 0,5  | 0,3  | 0,4  | 0,0  | 1,3            | -1,1 | -2,2 | -2,2 | -1,0 |
| D1                                                          | control        | 0,0      | -0,2 | 0,9    | -0,7 | 0,0 | -1,2          | -0,9 | -2,0 | -1,1 | -1,3 | 0,2            | 2,4  | -1,2 | -2,8 | -0,4 | -1,3           | 1,4  | -1,1 | -3,3 | -1,1 |
| D2                                                          | control        | 0,3      | 0,1  | 0,0    | -0,5 | 0,0 | -0,8          | -0,7 | -0,6 | -2,1 | -1,1 | -1,9           | -0,4 | -1,2 | -0,4 | -1,0 | -1,3           | 0,0  | -2,4 | -1,2 | -1,2 |
| D3                                                          | hsa-miR-210    | 0,1      | -0,2 | 0,2    | 0,0  | 0,0 | -3,1          | -3,2 | -3,2 | -3,8 | -3,3 | -4,5           | -4,5 | -5,0 | -4,7 | -4,7 | -4,9           | -5,4 | -5,2 | -5,5 | -5,3 |
| D4                                                          | hsa-miR-211    | 0,4      | -0,2 | -0,3   | 0,0  | 0,0 | 1,7           | -0,3 | 0,8  | -0,3 | 0,5  | 0,0            | 1,3  | -0,3 | 0,3  | 0,3  | 0,7            | 0,9  | -0,5 | -1,5 | -0,1 |
| D5                                                          | hsa-miR-213    | 0,0      | -0,2 | 0,1    | 0,0  | 0,0 | 0,1           | -0,1 | 0,1  | 0,1  | 0,1  | 0,5            | 0,5  | -0,1 | -0,1 | 0,2  | 0,2            | -0,2 | 0,1  | -0,2 | 0,0  |
| D6                                                          | hsa-miR-214    | 0,6      | 0,2  | -0,4   | -0,3 | 0,0 | 0,0           | 0,2  | -0,2 | -0,2 | -0,1 | 0,4            | 0,4  | -0,2 | -0,1 | 0,1  | 0,0            | -0,1 | -0,6 | -0,4 | -0,3 |
| D7                                                          | hsa-miR-215    | -0,2     | -0,4 | 0,4    | 0,2  | 0,0 | -0,3          | -0,2 | 0,5  | 0,2  | 0,0  | -0,7           | -0,7 | -0,5 | -0,2 | -0,5 | 0,2            | -0,1 | -0,5 | -0,3 | -0,2 |
| D8                                                          | hsa-miR-216    | -0,6     | -0,7 | 0,7    | 0,5  | 0,0 | -0,4          | -0,3 | 1,3  | 1,3  | 0,5  | -0,3           | -0,2 | 0,7  | 0,7  | 0,2  | -0,3           | -0,6 | 0,8  | 0,6  | 0,1  |
| D9                                                          | control        | -0,1     | -0,5 | 0,4    | 0,2  | 0,0 | 0,5           | 0,7  | 0,9  | 0,8  | 0,7  | 0,6            | 0,5  | 0,7  | 0,7  | 0,6  | 0,8            | 0,4  | 0,9  | 0,4  | 0,6  |
| D10                                                         | hsa-miR-218    | 1,1      | 0,7  | -0,7   | -1,1 | 0,0 | 0,8           | 0,8  | -0,3 | -0,5 | 0,2  | 1,3            | 1,3  | 0,1  | 0,1  | 0,7  | 1,3            | 0,7  | 0,5  | 0,3  | 0,7  |
| D11                                                         | hsa-miR-219    | -0,4     | -0,4 | 0,3    | 0,4  | 0,0 | 0,0           | -0,2 | -0,4 | -0,3 | -0,2 | -0,1           | 0,2  | 0,0  | 0,0  | 0,0  | -0,2           | -0,3 | 0,5  | -0,3 | -0,1 |
| D12                                                         | hsa-miR-220    | 0,3      | 0,1  | 0,0    | -0,5 | 0,0 | -0,8          | -0,7 | -0,6 | -0,3 | -0,6 | -0,3           | -0,4 | -0,6 | -0,4 | -0,4 | 0,5            | 0,0  | -1,3 | -1,1 | -0,5 |
| E1                                                          | hsa-miR-221    | 1,0      | 0,3  | -0,4   | -0,9 | 0,0 | 0,4           | 0,7  | -0,1 | -0,6 | 0,1  | 0,9            | 1,2  | 0,0  | -0,1 | 0,5  | 1,3            | 1,2  | 0,0  | 0,2  | 0,7  |
| E2                                                          | hsa-miR-222    | 0,6      | 0,0  | -0,1   | -0,6 | 0,0 | 0,5           | 0,4  | -0,1 | -0,5 | 0,1  | 0,4            | 0,3  | -0,4 | -0,3 | 0,0  | 0,1            | -0,1 | -0,8 | -0,6 | -0,3 |
| E3                                                          | hsa-miR-223    | 0,1      | -0,8 | 0,0    | 0,7  | 0,0 | -0,4          | 0,6  | -0,9 | -1,8 | -0,6 | -0,9           | -1,2 | -1,7 | -1,6 | -1,4 | 0,0            | 0,3  | 1,2  | -0,1 | 0,3  |
| E4                                                          | hsa-miR-224    | 0,5      | 0,3  | -0,4   | -0,5 | 0,0 | 0,5           | 0,5  | 0,0  | -0,2 | 0,2  | 0,5            | 0,5  | -0,1 | -0,1 | 0,2  | 0,6            | 0,2  | 0,2  | 0,2  | 0,3  |
| E5                                                          | hsa-miR-296    | -0,9     | -0,6 | 1,1    | 0,3  | 0,0 | -1,3          | -1,0 | -0,2 | -0,7 | -0,8 | -0,6           | -0,7 | -0,5 | -0,6 | -0,6 | -1,5           | -1,3 | -0,6 | -1,1 | -1,1 |
| E6                                                          | hsa-miR-299    | -0,1     | -0,1 | 0,0    | 0,1  | 0,0 | -0,7          | -0,2 | 1,1  | -0,2 | 0,0  | -0,4           | -0,9 | 0,1  | 0,2  | -0,2 | -0,5           | -0,9 | -0,5 | 0,1  | -0,4 |
| E7                                                          | hsa-miR-301    | 0,3      | 0,0  | -0,3   | 0,0  | 0,0 | 0,0           | 0,2  | -0,2 | 0,4  | 0,1  | 0,1            | 0,1  | 0,1  | -0,1 | 0,0  | -0,1           | -0,2 | -0,3 | -0,2 | -0,2 |
| E8                                                          | hsa-miR-302a   | -1,3     | 2,0  | -2,0   | 1,4  | 0,0 | 1,0           | 1,2  | 1,2  | -3,6 | -0,1 | 1,5            | 1,5  | 1,2  | 1,4  | 1,4  | 2,3            | 1,8  | 0,5  | 0,0  | 1,2  |
| E9                                                          | hsa-miR-302b   | 0,3      | 0,1  | 0,0    | -0,5 | 0,0 | -0,8          | -0,7 | 0,6  | -1,1 | -0,8 | -0,3           | -0,4 | -0,6 | -0,4 | -0,4 | 0,5            | 0,0  | -1,3 | -1,1 | -0,5 |
| E10                                                         | hsa-miR-302b*  | 0,2      | 0,2  | 0,1    | -0,4 | 0,0 | -0,8          | -0,6 | -3,5 | -5,4 | -2,6 | -0,3           | -0,3 | -1,0 | -6,2 | -1,9 | 0,5            | 0,1  | -7,0 | -4,9 | -2,8 |
| E11                                                         | hsa-miR-302c   | 0,3      | 0,1  | 0,0    | -0,5 | 0,0 | -0,8          | -0,7 | -0,6 | -0,3 | -0,6 | -0,3           | -0,4 | -0,6 | -0,4 | -0,4 | 0,5            | 0,0  | -1,3 | -1,3 | -0,5 |
| E12                                                         | hsa-miR-302c*  | 0,3      | 0,1  | 0,0    | -0,5 | 0,0 | -0,8          | -0,7 | -0,6 | -0,3 | -0,6 | -0,3           | -0,4 | -0,6 | -0,4 | -0,4 | 0,5            | 0,0  | -1,3 | -1,1 | -0,5 |
| F1                                                          | hsa-miR-302d   | 0,3      | 0,1  | 0,0    | -0,5 | 0,0 | -0,8          | -0,7 | -5,2 | -2,1 | -2,2 | -0,3           | -0,4 | -0,6 | -2,3 | -0,9 | 0,5            | 0,0  | -3,7 | -4,2 | -1,9 |
| F2                                                          | hsa-miR-320    | 1,6      | 0,8  | -1,0   | -1,3 | 0,0 | 0,7           | 0,7  | -0,8 | -1,0 | -0,1 | 0,7            | 0,8  | -0,5 | -0,2 | 0,2  | 0,4            | 0,2  | -1,1 | -1,2 | -0,4 |
| F3                                                          | control        | 0,1      | -0,2 | 0,1    | 0,0  | 0,0 | 0,8           | 0,7  | -0,6 | -0,5 | 0,1  | 2,3            | 2,0  | 0,8  | 0,9  | 1,5  | 2,6            | 2,3  | 2,2  | 2,5  | 2,4  |
| F4                                                          | hsa-miR-323    | 0,0      | 0,2  | -0,1   | -0,2 | 0,0 | 0,2           | 0,2  | -1,1 | -1,1 | -0,5 | 0,3            | 0,4  | -0,4 | -0,4 | 0,0  | -0,1           | 0,2  | -0,4 | -0,3 | -0,1 |
| F5                                                          | control        | 0,2      | 0,5  | -0,1   | -0,6 | 0,0 | 0,6           | 0,8  | 0,4  | -0,1 | 0,4  | -0,3           | 0,3  | 0,6  | 0,4  | 0,2  | 0,0            | 0,0  | 0,0  | 0,4  | 0,1  |
| F6                                                          | hsa-miR-324-5p | 0,5      | 0,2  | -0,2</ |      |     |               |      |      |      |      |                |      |      |      |      |                |      |      |      |      |

# Table S2

| detectable |            |            |           |          |            | not detectable |           |
|------------|------------|------------|-----------|----------|------------|----------------|-----------|
| miR-21     | miR-186    | miR-98     | miR-127   | miR-204  | miR-338    | miR-9*         | miR-220   |
| miR-126    | miR-25     | miR-137    | miR-152   | miR-299  | miR-34c    | miR-105        | miR-302a  |
| let-7d     | miR-26a    | miR-140    | miR-154*  | miR-323  | miR-9      | miR-122a       | miR-302b  |
| miR-16     | miR-30b    | miR-151    | miR-199a  | miR-340  | miR-95     | miR-133a       | miR-302b* |
| miR-17-5p  | miR-30c    | miR-155    | miR-199-s | miR-128b | miR-142-3p | miR-133b       | miR-302c  |
| miR-23a    | miR-31     | miR-191    | miR-210   | miR-148a | miR-187    | miR-135b       | miR-302c* |
| miR-29a    | miR-34a    | miR-195    | miR-213   | miR-197  | miR-200b   | miR-138        | miR-302d  |
| miR-29c    | miR-92     | miR-216    | miR-218   | miR-326  | miR-200c   | miR-142-5p     | miR-325   |
| miR-100    | miR-103    | miR-23b    | miR-339   | miR-368  | miR-34b    | miR-144        | miR-367   |
| miR-221    | miR-125b   | miR-301    | miR-17-3p | miR-145  | miR-124a   | miR-182*       | miR-371   |
| miR-222    | miR-130a   | miR-320    | miR-107   | miR-149  | miR-135a   | miR-183        | miR-372   |
| let-7a     | miR-130b   | miR-324-5p | miR-134   | miR-215  | miR-150    | miR-184        | miR-373   |
| miR-19a    | let-7b     | miR-374    | miR-181c  | miR-296  | miR-182    | miR-198        | miR-373*  |
| miR-20     | miR-15a    | miR-28     | miR-185   | miR-330  | miR-190    | miR-205        |           |
| miR-27a    | miR-125a   | miR-30d    | miR-194   | miR-124b | miR-203    |                |           |
| miR-29b    | miR-146    | miR-193    | miR-335   | miR-129  | miR-96     |                |           |
| miR-99a    | miR-181a   | miR-214    | miR-370   | miR-141  | miR-104    |                |           |
| miR-106a   | miR-199a*  | miR-224    | miR-128a  | miR-189  | miR-147    |                |           |
| miR-181b   | miR-10a    | miR-331    | miR-132   | miR-200a | miR-211    |                |           |
| let-7g     | miR-27b    | miR-342    | miR-139   | miR-219  | miR-223    |                |           |
| let-7i     | miR-26b    | let-7e     | miR-154   | miR-328  |            |                |           |
| miR-15b    | miR-30a-3p | miR-30e    | miR-199b  | miR-337  |            |                |           |

# Table S3

## miR-210

| Gene name                                                    | Gene symbol | # of algorithms | expression   |
|--------------------------------------------------------------|-------------|-----------------|--------------|
| <i>ephrin-A3</i>                                             | EFNA3       | 4               | ubiquitous   |
| <i>glycerol-3-phosphate dehydrogenase 1-like</i>             | GPD1L       | 4               | ubiquitous   |
| <i>neuronal pentraxin 1</i>                                  | NP1X1       | 4               | neuronal     |
| <i>huntingtin interacting protein B transcript variant 1</i> | SETD2       | 3               | ubiquitous   |
| <i>chondroadherin</i>                                        | CHAD        | 3               | chondrocytes |

## miR-150

| Gene name                                                  | Gene symbol | # of algorithms | expression                |
|------------------------------------------------------------|-------------|-----------------|---------------------------|
| <i>v-myb myeloblastosis viral oncogene homolog (avian)</i> | MYB         | 3               | ubiquitous                |
| <i>ELK1, member of ETS oncogene family</i>                 | ELK1        | 3               | ubiquitous                |
| <i>GDP dissociation inhibitor 1</i>                        | GDI1        | 3               | ubiquitous                |
| <i>transmembrane protein 24</i>                            | TMEM24      | 3               | ubiquitous (not vascular) |

# Figure S1

**A**

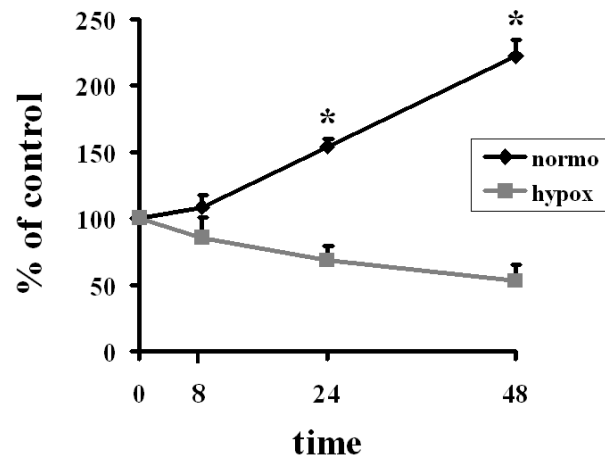

**B**

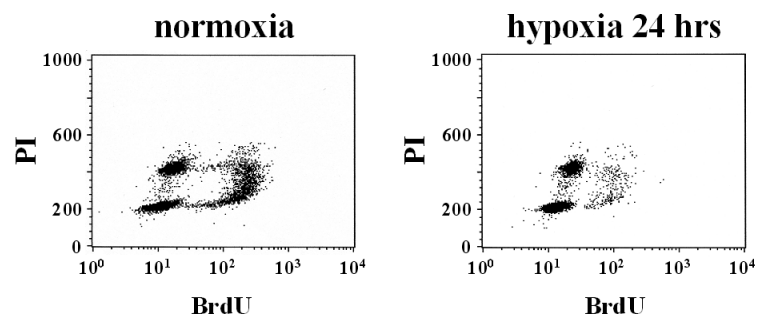

**C**

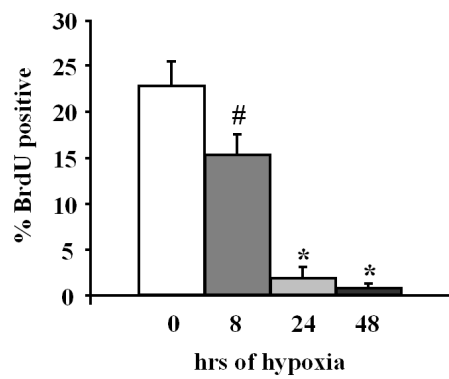

# Figure S2

**A**

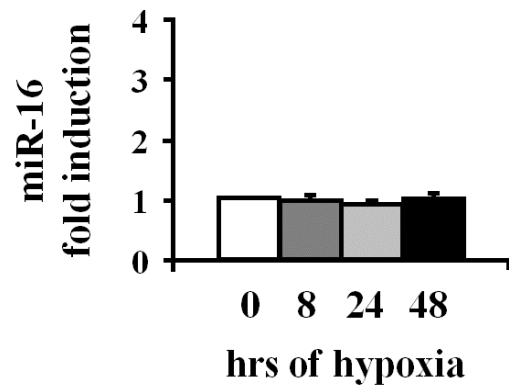

**B**

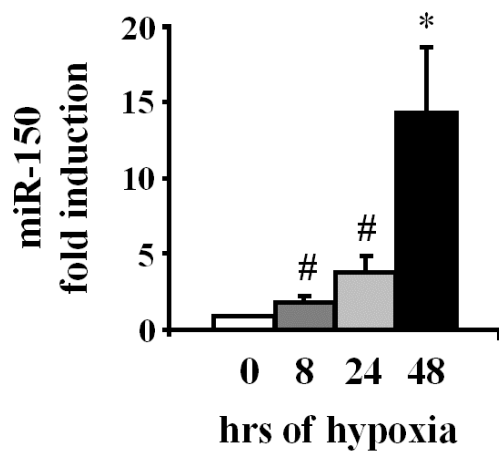

**C**

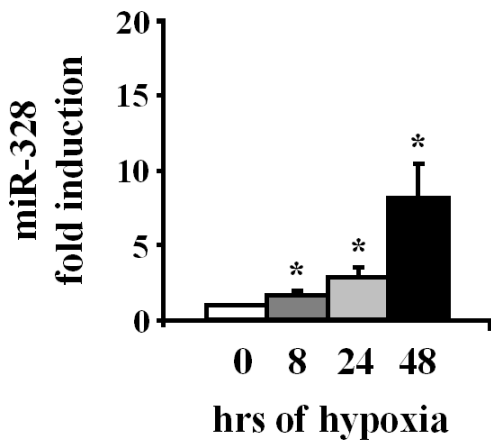

**Figure S3**

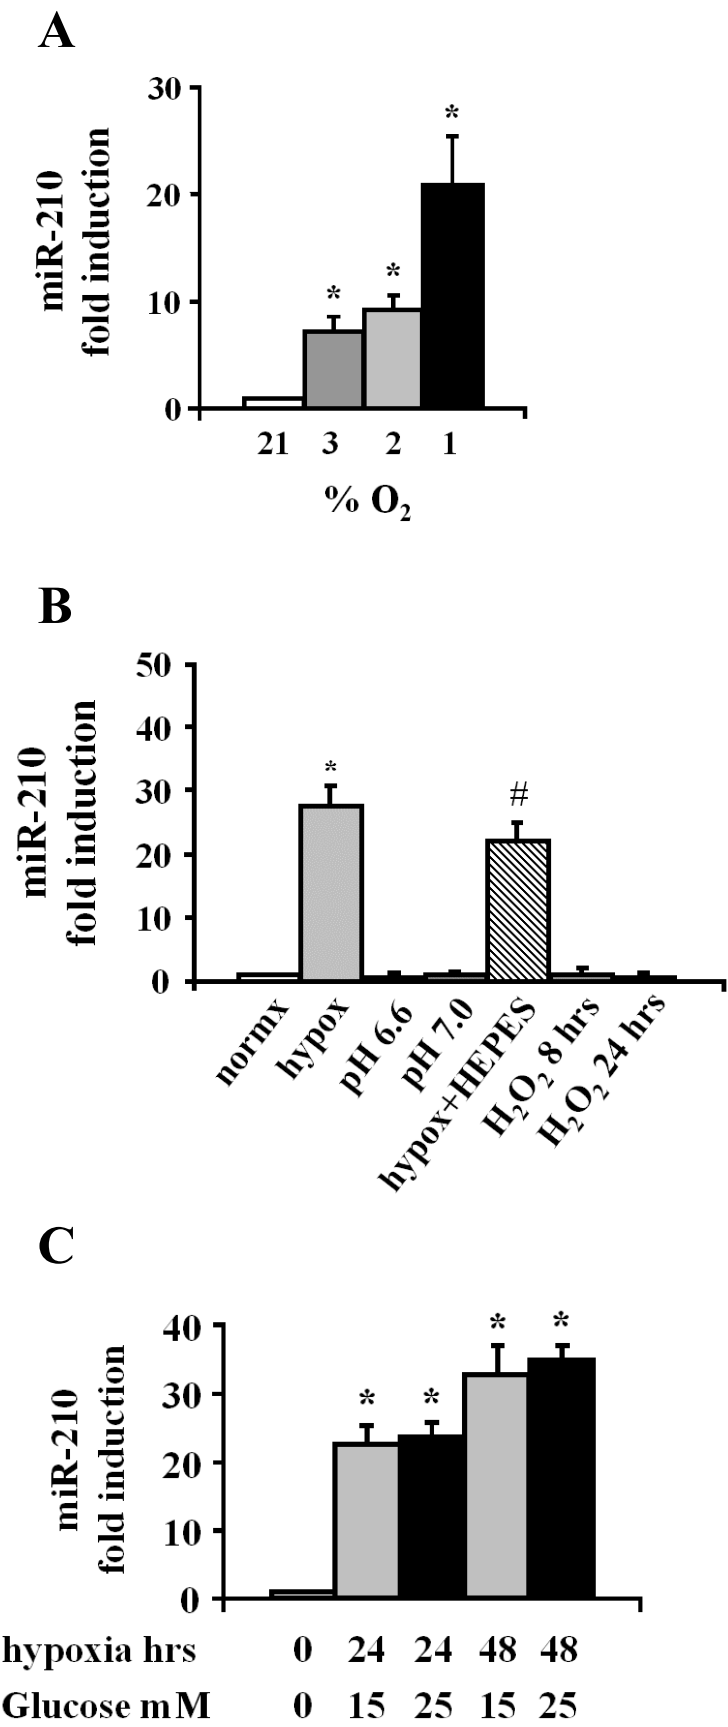

# Figure S4

**A**

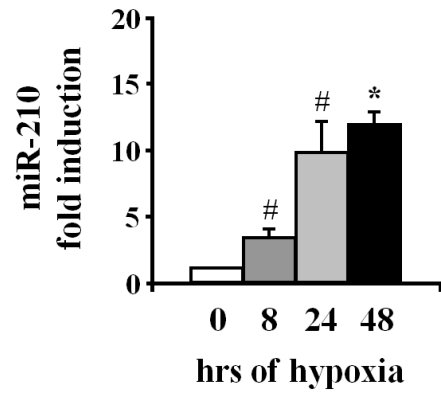

**B**

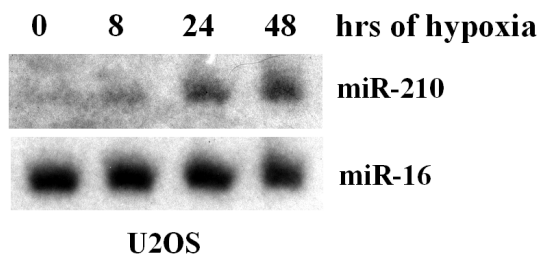

**Figure S5**

**A**

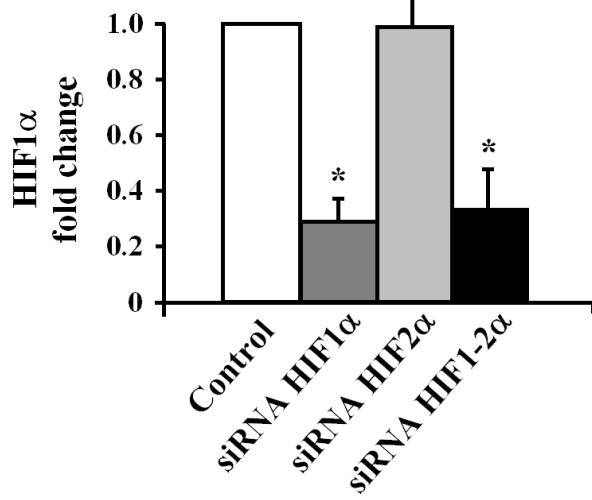

**B**

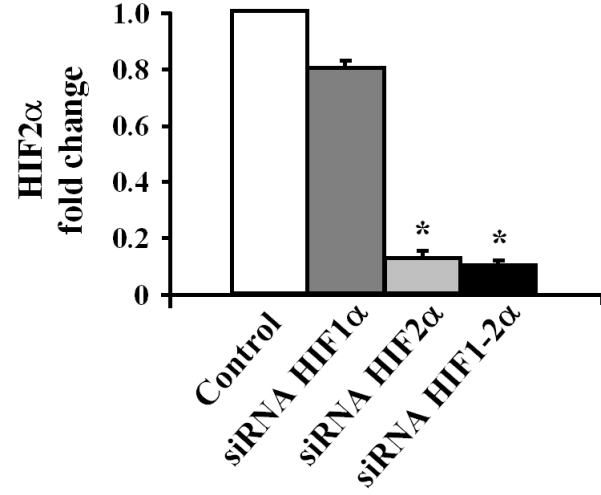

**C**

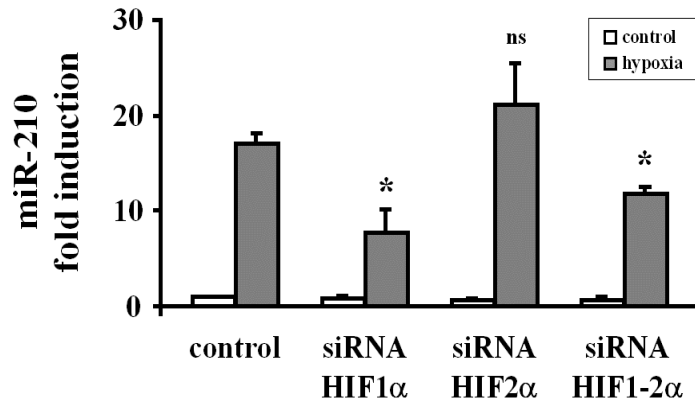

**D**

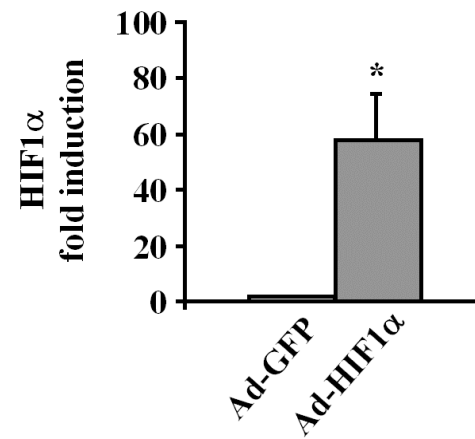

**E**

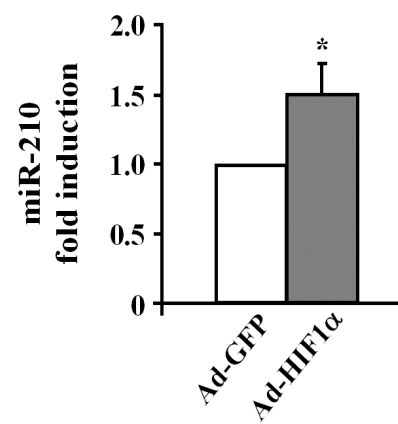

Figure S6

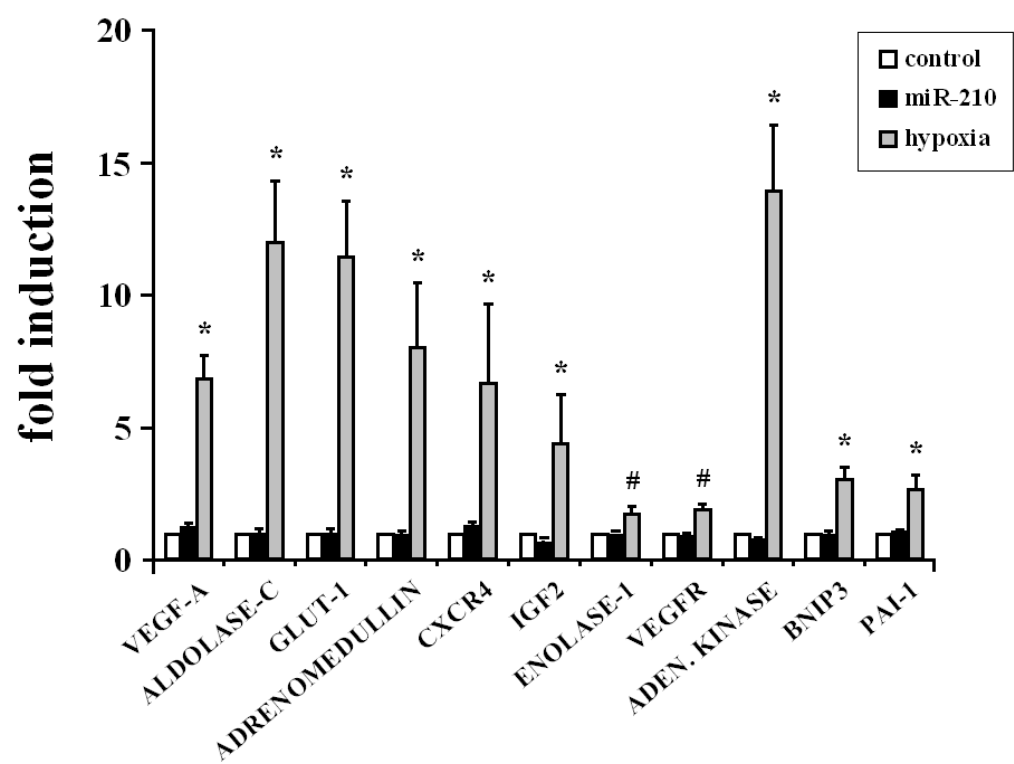

Figure S7

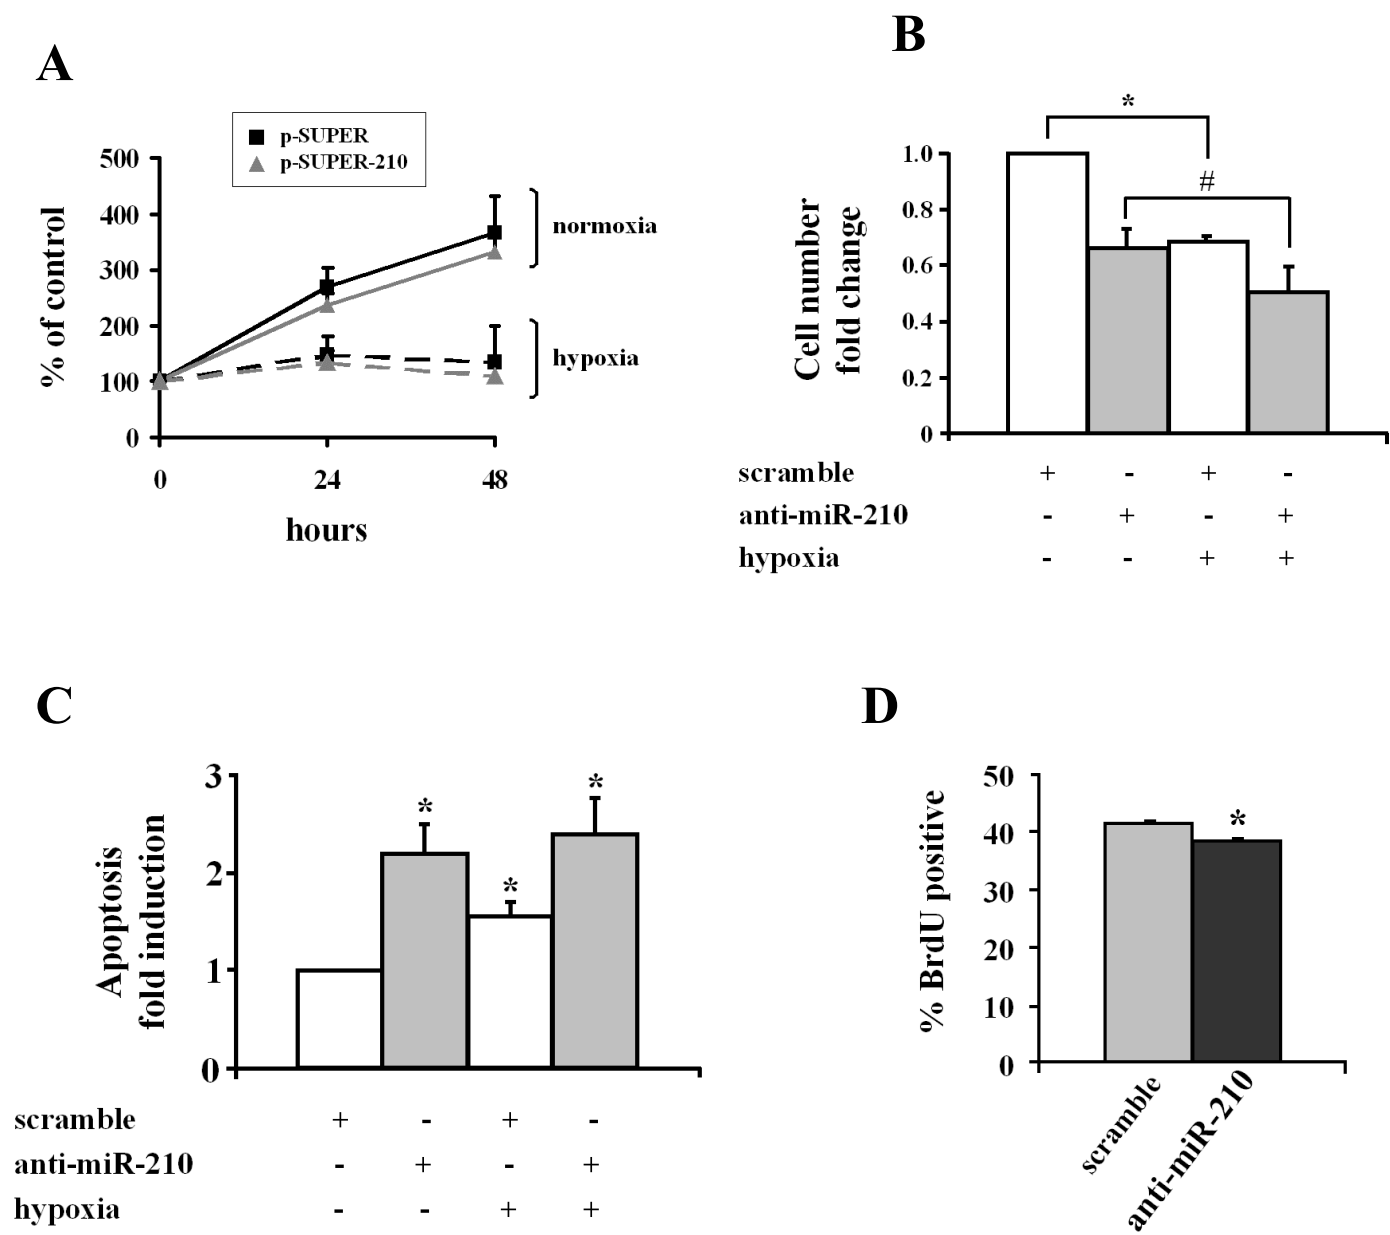

# Figure S8

**A**

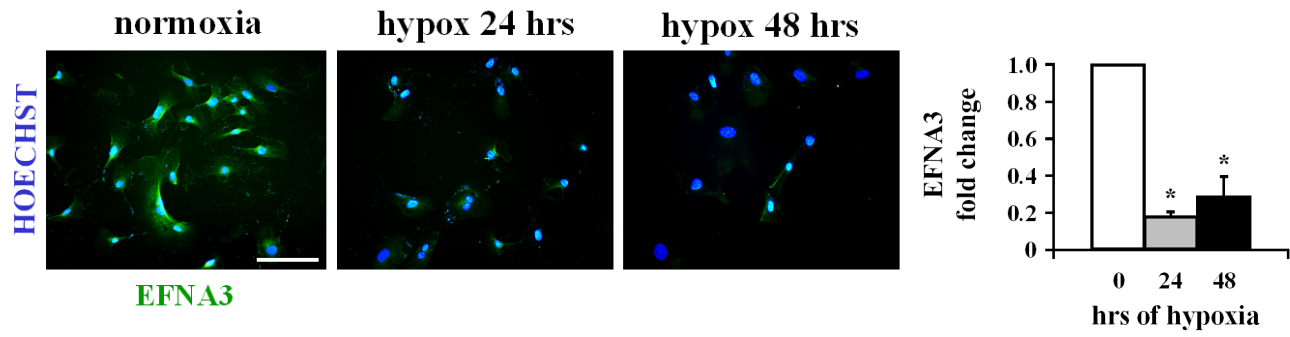

**B**

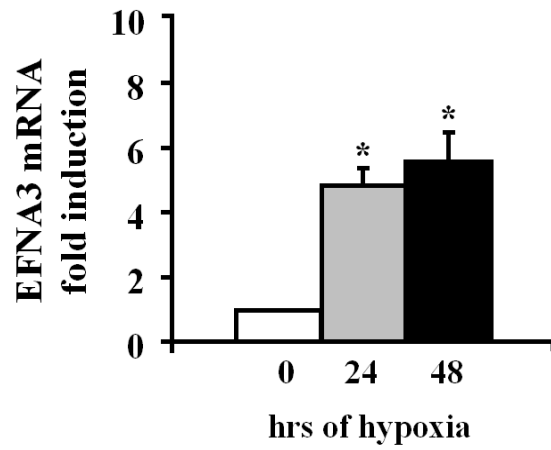

**C**

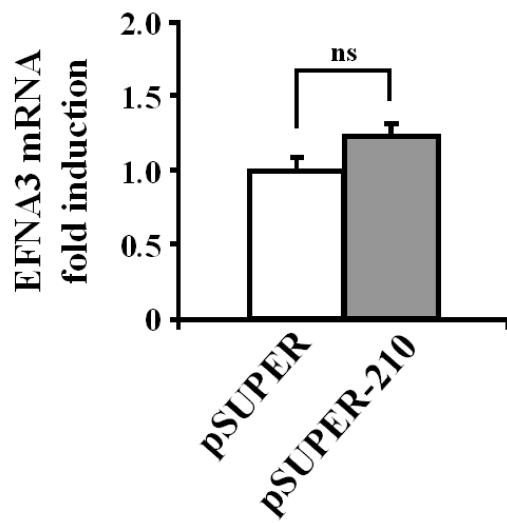

Supplement: supp_M800731200_M800731_fasanaro_supplements.pdf [file supp_M800731200_M800731_fasanaro_supplements.pdf]
